# Supplementary material for: Heterogeneous O-arylation of nitroarenes with substituted phenols over a copper immobilized mesoporous silica catalyst
Source: Royal Society of Chemistry journal article supplement (doi:10.1039/c6ra04409c), 2016-01-01
Supplement: c6ra04409c1.pdf [file c6ra04409c1.pdf]

## Electronic supplementary information

### Heterogeneous O-arylation of nitroarenes with substituted phenols over copper immobilized mesoporous silica catalyst<sup>#</sup>

Tanmoy Maity, Susmita Bhunia, Soma Das and Subratanath Koner\*

<sup>#</sup>All authors have equal contribution.

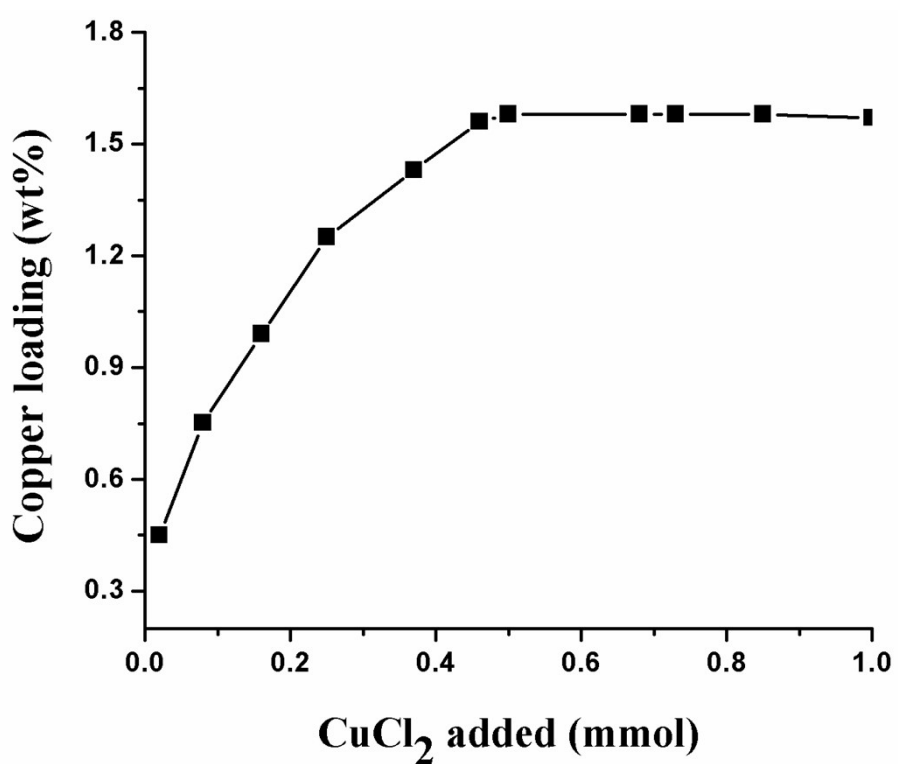

Fig. S1 Plot for optimal copper loading

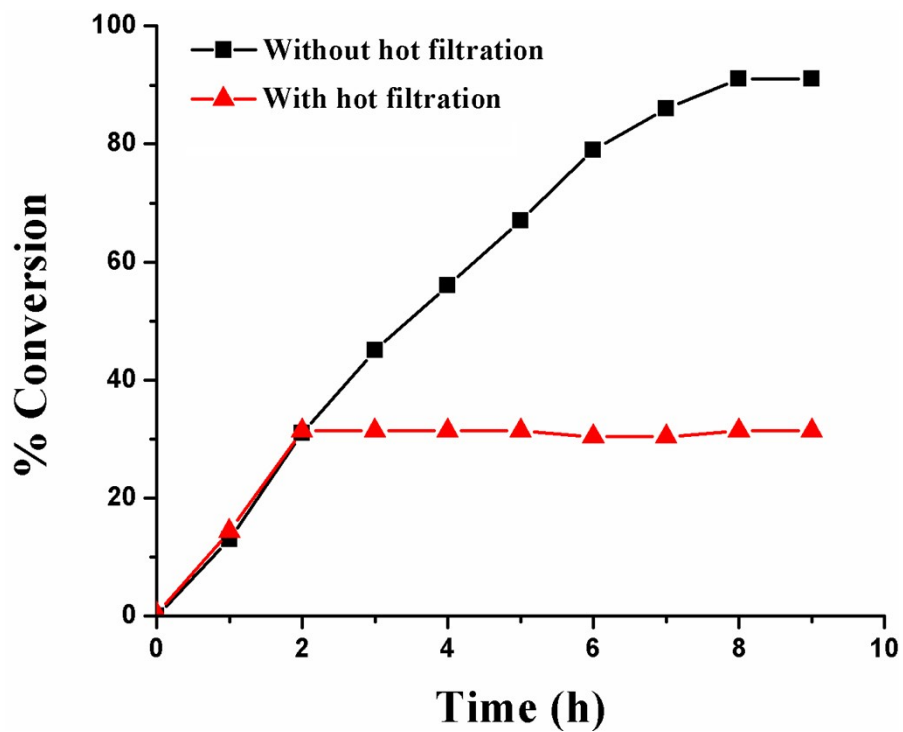

Fig. S2 Plot showing hot filtration test for O-arylation reaction of phenol with *p*-nitrobenzaldehyde

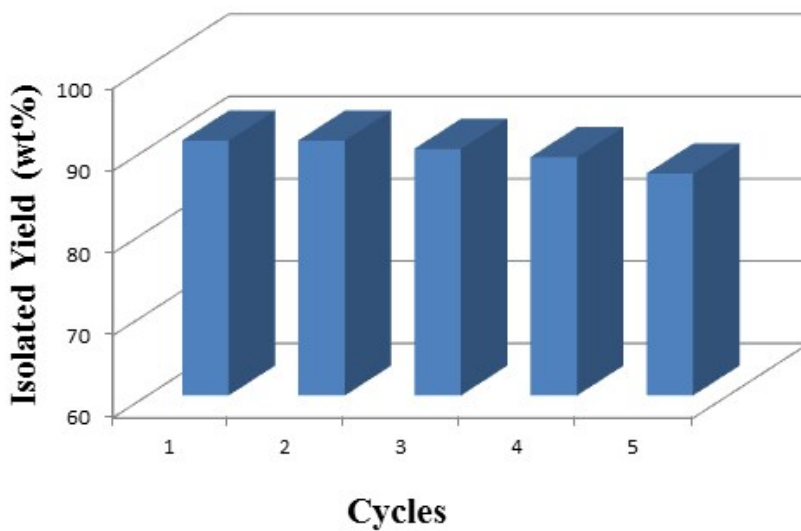

Fig. S3 Bar diagram showing recyclability of the catalyst for O-arylation of phenol

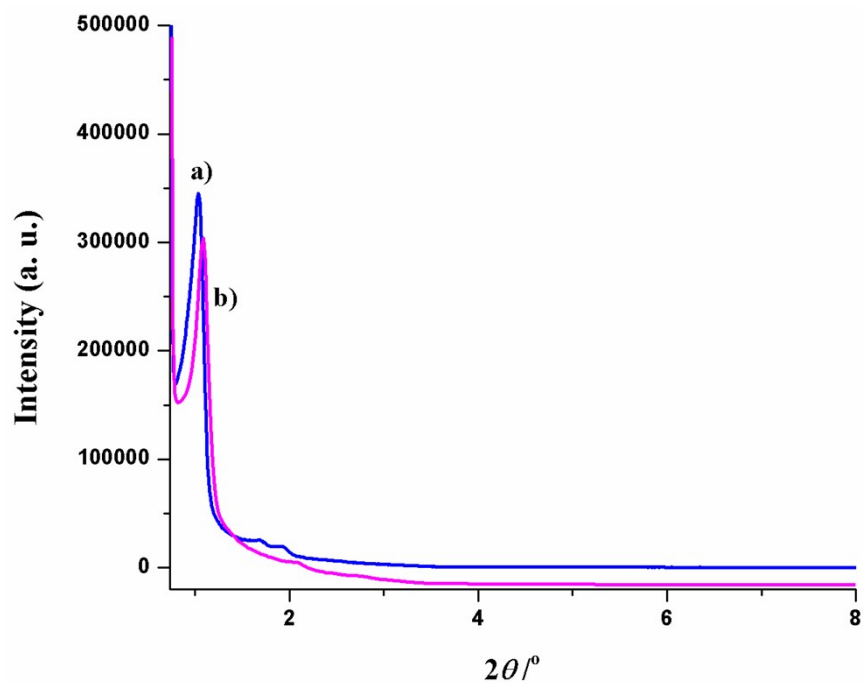

Fig. S4 PXR D patterns of (a) pristine S@Cu and (b) recovered S@Cu

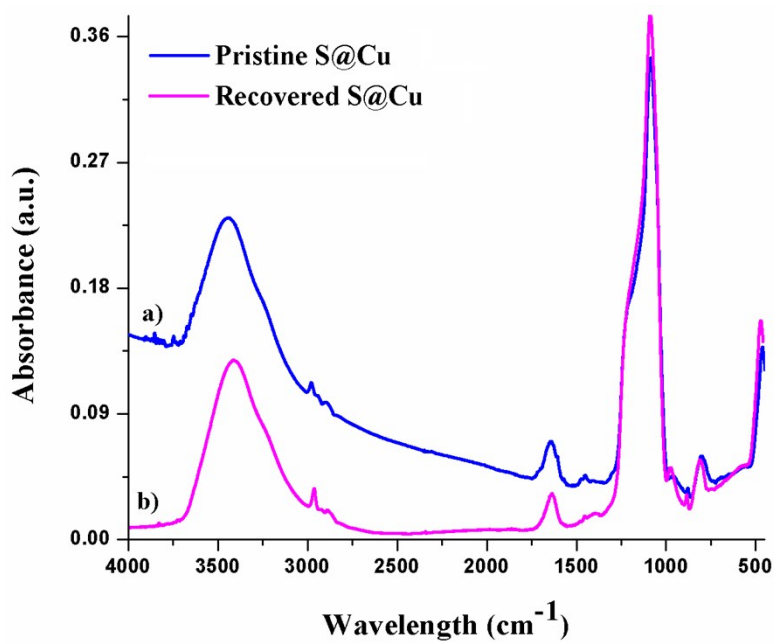

Fig. S5 FTIR spectra of (a) pristine S@Cu and (b) recovered S@Cu

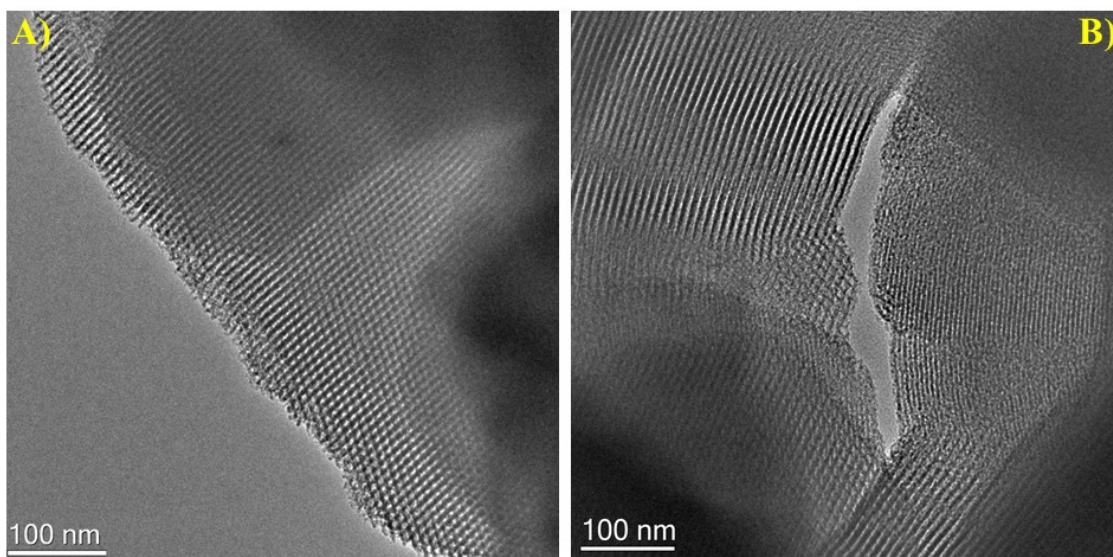

**Fig. S6** TEM images of (a) pristine S@Cu and (b) recovered S@Cu

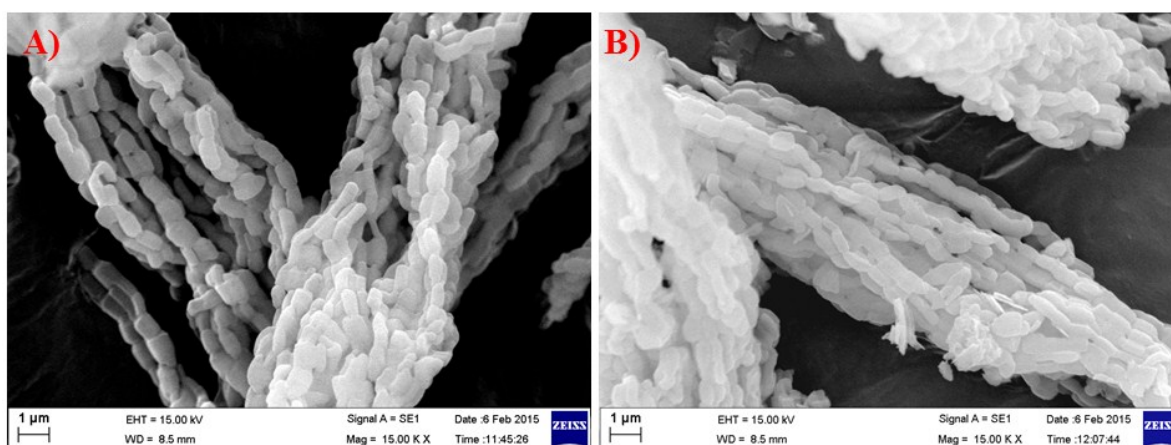

**Fig. S7** SEM images of (a) pristine S@Cu and (b) recovered S@Cu

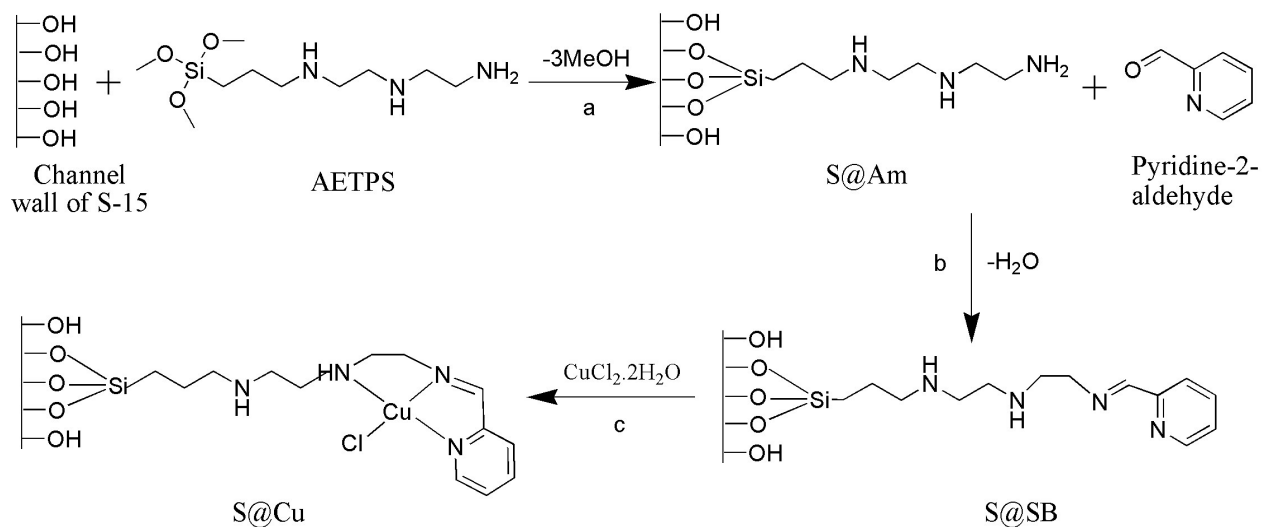

**Scheme S1** (a) Modification of S-15 channel wall: AETPS/toluene, (b) condensation with pyridine-2-aldehyde in methanol, (c) metal complex formation:  $\text{CuCl}_2 \cdot 2\text{H}_2\text{O}$ /methanol/reflux.

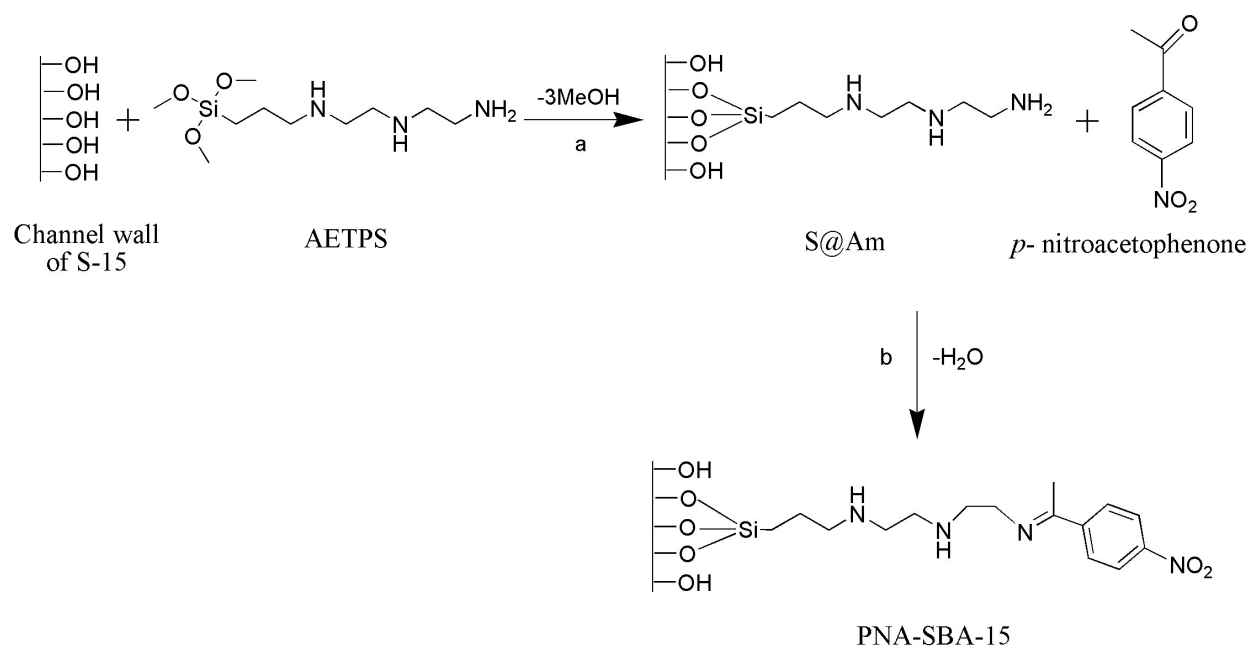

**Scheme S2** (a) Organic modification of SBA-15: AETPS/toluene, (b) anchoring of *p*-nitroacetophenone onto SBA-15 (in methanol)

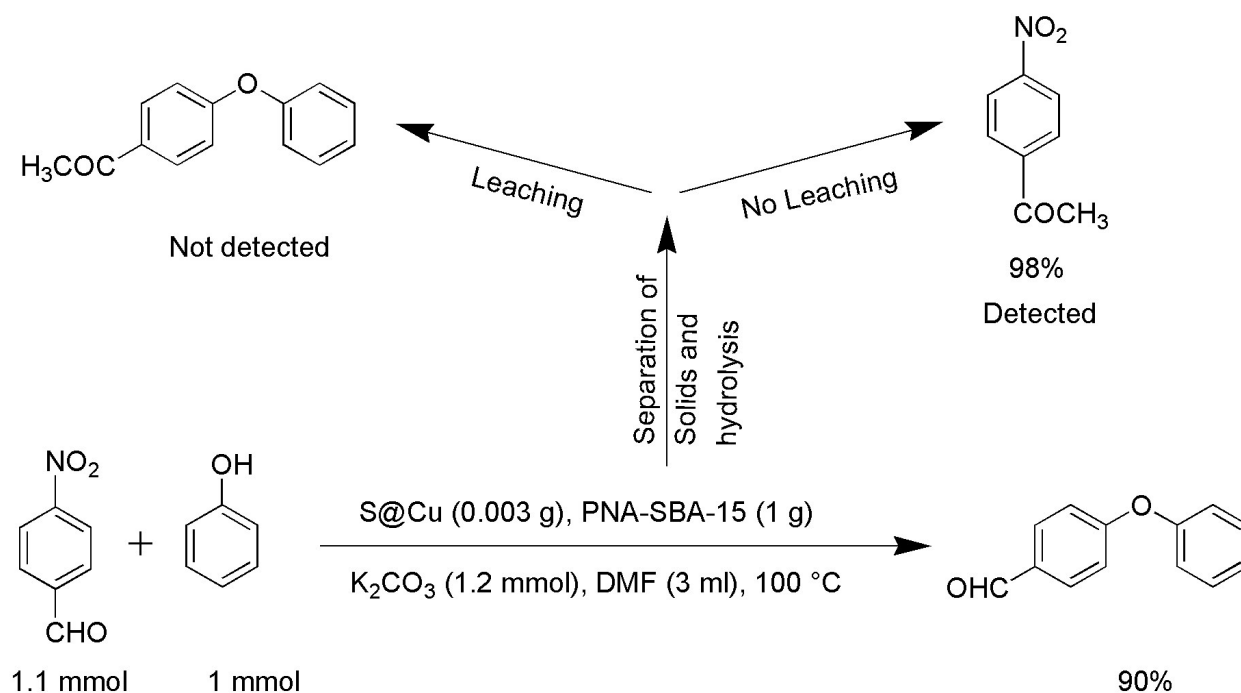

**Scheme S3** Three-phase test for O-arylation reaction

**Table S1**  $N_2$  adsorption characteristics of supports and catalysis at 77 K: specific surface area,  $S_{BET}$  ( $m^2 g^{-1}$ ); pore volume ( $cm^3 g^{-1}$ ); half pore width,  $D_{NLDFT}$  ( $\text{\AA}$ )

| Materials | $S_{BET}$ | Pore volume | $D_{NLDFT}$ |
|-----------|-----------|-------------|-------------|
| SBA-15    | 1431      | 1.62        | 31          |
| S@Am      | 750       | 1.02        | 24          |
| S@Cu      | 312       | 0.39        | 22          |

**Table S2** Optimization of reaction conditions<sup>a</sup>

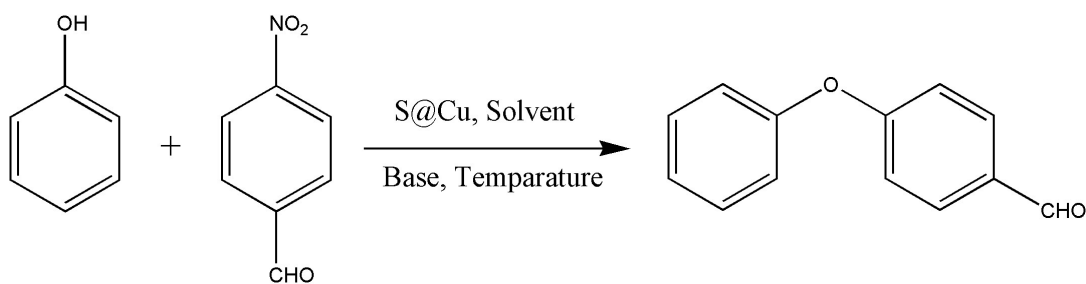

| Entry           | Catalyst                                   | Base                            | Solvent        | Yield <sup>b</sup> (%) |
|-----------------|--------------------------------------------|---------------------------------|----------------|------------------------|
| 1               | –                                          | K <sub>2</sub> CO <sub>3</sub>  | DMF            | –                      |
| 2               | S@Cu                                       | K <sub>2</sub> CO <sub>3</sub>  | DMF            | <b>91</b>              |
| 3               | S@Cu                                       | K <sub>2</sub> CO <sub>3</sub>  | DMSO           | 87                     |
| 4               | S@Cu                                       | K <sub>2</sub> CO <sub>3</sub>  | Toluene        | 15                     |
| 5               | S@Cu                                       | K <sub>2</sub> CO <sub>3</sub>  | Acetonitrile   | 31                     |
| 6               | S@Cu                                       | K <sub>2</sub> CO <sub>3</sub>  | Methanol       | 58                     |
| 7               | S@Cu                                       | K <sub>2</sub> CO <sub>3</sub>  | Ethyleneglycol | 64                     |
| 8               | S@Cu                                       | K <sub>2</sub> CO <sub>3</sub>  | Dioxane        | 62                     |
| 9               | S@Cu                                       | KOH                             | DMF            | 55                     |
| 10              | S@Cu                                       | Na <sub>2</sub> CO <sub>3</sub> | DMF            | 62                     |
| 11              | S@Cu                                       | Cs <sub>2</sub> CO <sub>3</sub> | DMF            | 90                     |
| 12              | S@Cu                                       | CH <sub>3</sub> COONa           | DMF            | –                      |
| 13              | S@Cu                                       | <i>t</i> BuOK                   | DMF            | 21                     |
| 14              | S@Cu                                       | DABCO                           | DMF            | –                      |
| 15 <sup>c</sup> | S@Cu                                       | K <sub>2</sub> CO <sub>3</sub>  | DMF            | 58 <sup>d</sup>        |
| 16 <sup>e</sup> | S@Cu                                       | K <sub>2</sub> CO <sub>3</sub>  | DMF            | 79                     |
| 17              | S@Am+ CuCl <sub>2</sub> ·2H <sub>2</sub> O | K <sub>2</sub> CO <sub>3</sub>  | DMF            | 25                     |
| 18              | S@SB+ CuCl <sub>2</sub> ·2H <sub>2</sub> O | K <sub>2</sub> CO <sub>3</sub>  | DMF            | 29                     |
| 19              | CuCl <sub>2</sub> ·2H <sub>2</sub> O       | K <sub>2</sub> CO <sub>3</sub>  | DMF            | 73                     |

<sup>a</sup> Reaction condition: *p*-nitrobenzaldehyde (1.1 mmol), phenol (1.0 mmol), base (1.2 mmol), catalyst (0.025 mol%), solvent (3 mL) at 100 °C for 8 h.

<sup>b</sup> Isolated yield.

<sup>c</sup> temperature was 60 °C.

<sup>d</sup> Isolated yield at 20 h.

<sup>e</sup> temperature was 120 °C at 8 h.

### Characterization of products

**1a**;  $\delta_{\text{H}}$  (300 MHz, CDCl<sub>3</sub>, ppm) 6.98–7.11 (m, 4H), 7.23–7.28 (m, 1H), 7.41–7.46 (m, 2H), 8.16–8.20 (m, 2H);  $\delta_{\text{C}}$  (75 MHz; CDCl<sub>3</sub>) 117.11, 120.54, 125.43, 125.93, 130.34, 132.63, 142.65,

154.73, 163.38;  $m/z$  216.0592 [(M+H)<sup>+</sup>, 100%]; Elemental analysis (found: C, 66.93; H, 4.24; N, 6.49. for C<sub>12</sub>H<sub>9</sub>NO<sub>3</sub> requires: C, 66.97; H, 4.22; N, 6.51%).

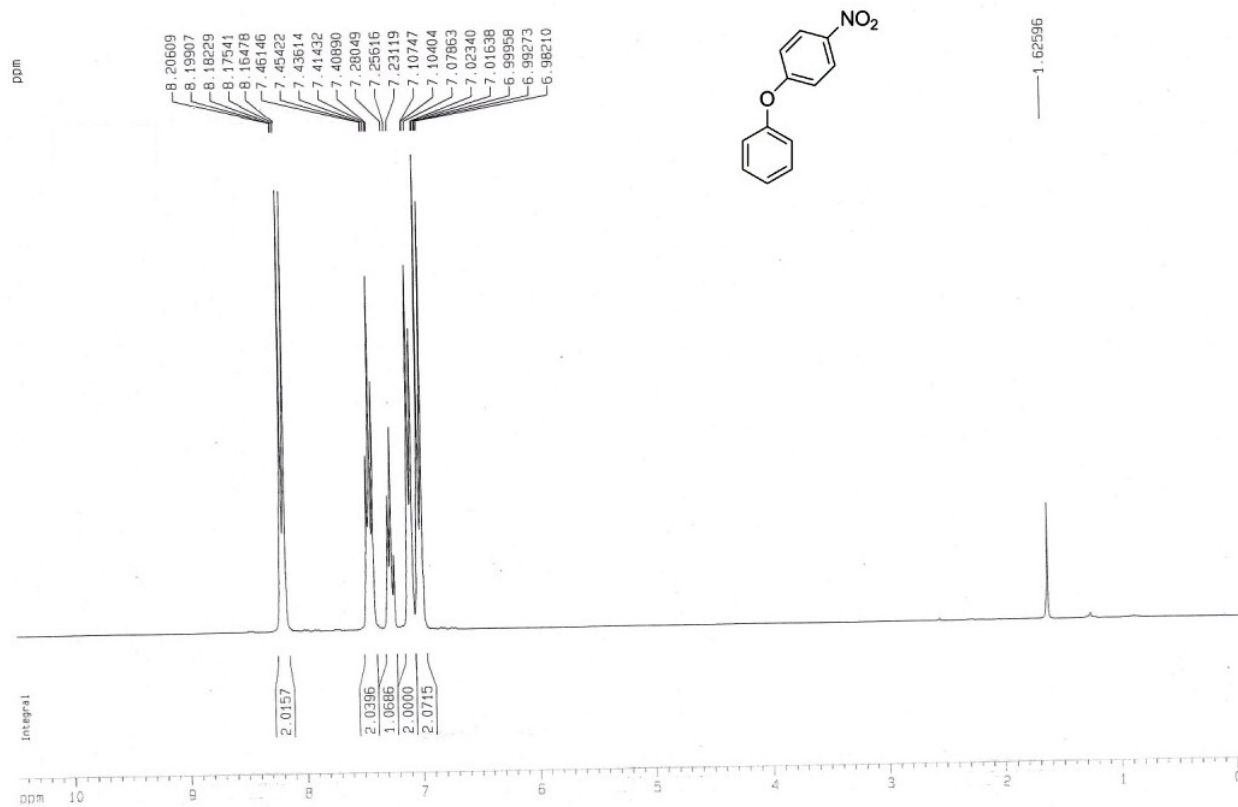



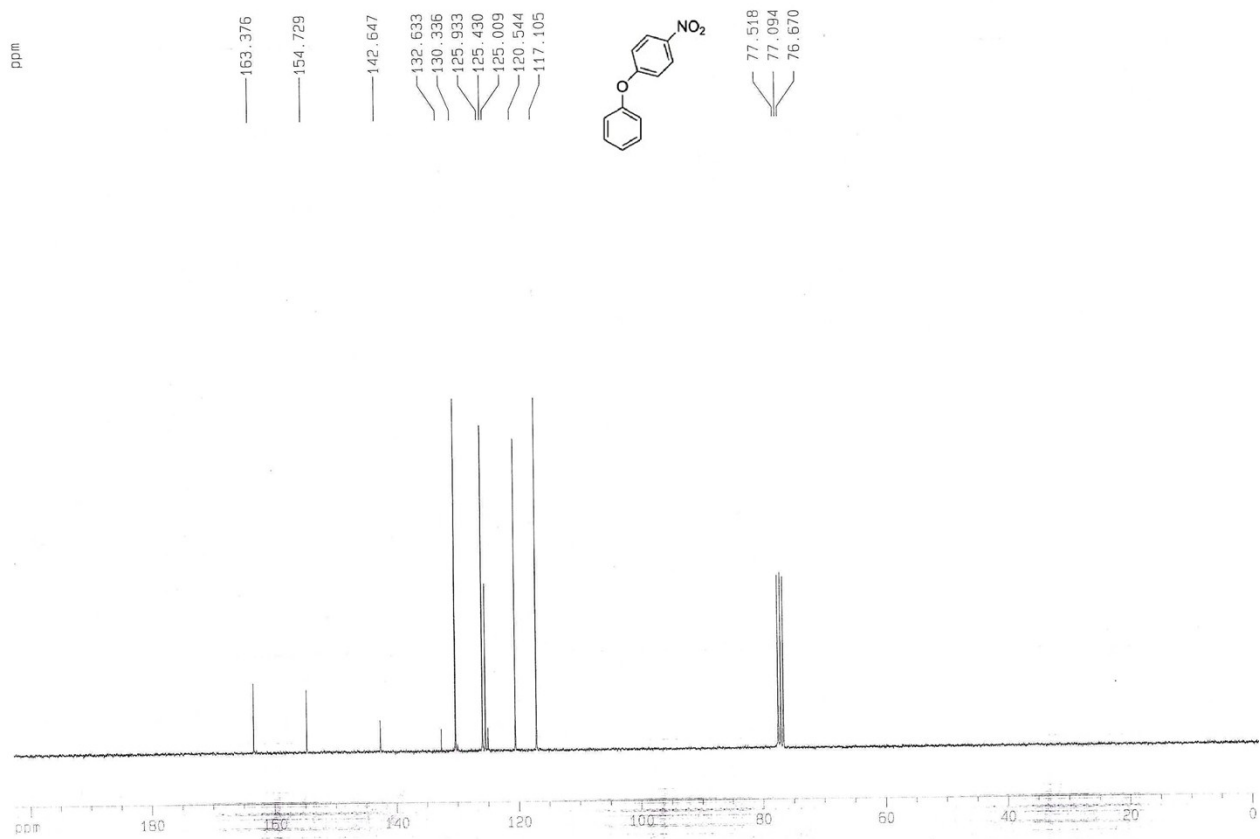

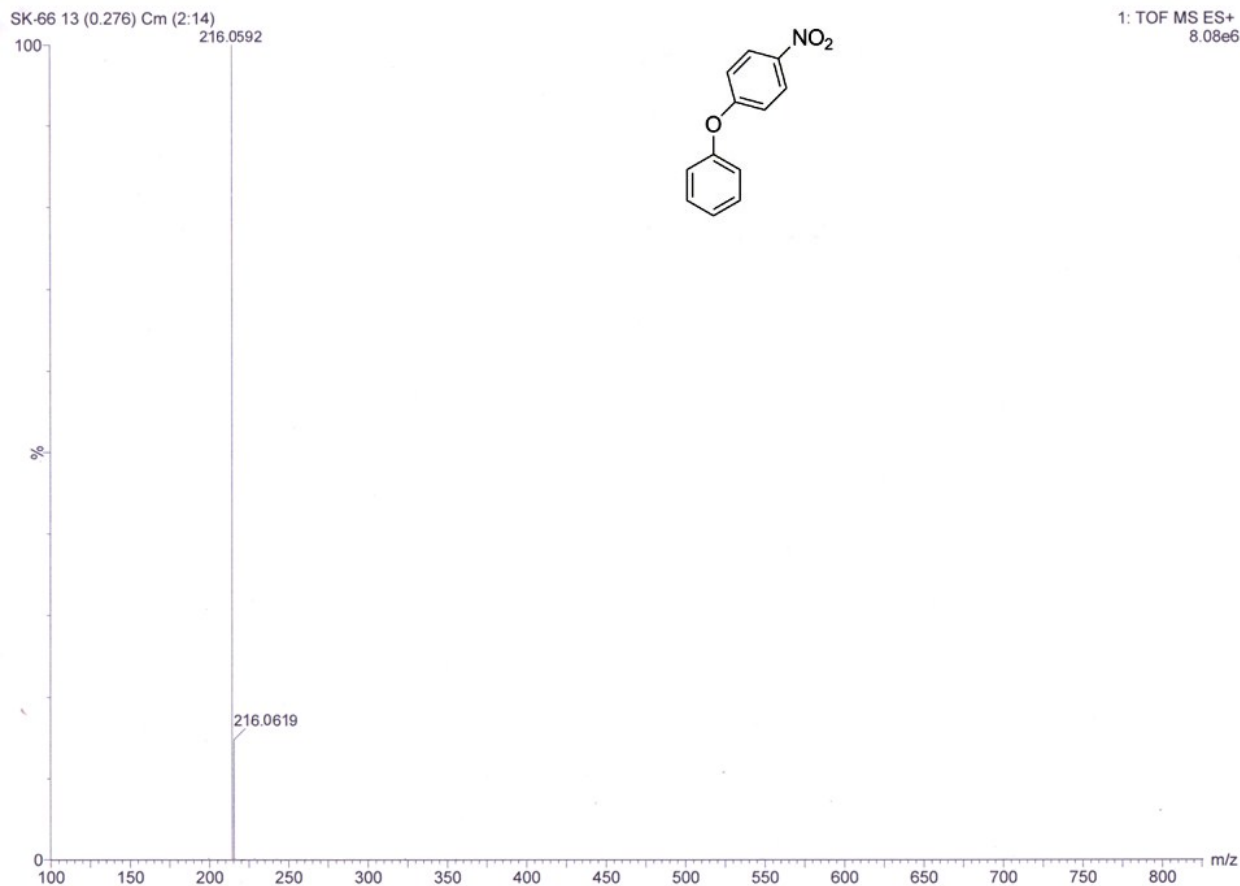

**1b**;  $\delta_{\text{H}}$  (300 MHz,  $\text{CDCl}_3$ , ppm) 6.99–7.07 (m, 3H), 7.17–7.22 (m, 2H), 7.39 (t,  $J = 7.9$  Hz, 2H), 7.47–7.53 (m, 1H), 7.94–7.97 (m, 1H);  $\delta_{\text{C}}$  (75 MHz;  $\text{CDCl}_3$ ) 117.11, 120.54, 125.43, 125.93, 130.34, 132.63, 142.65, 154.73, 163.38; Elemental analysis (found: C, 66.98; H, 4.24; N, 6.52. for  $\text{C}_{12}\text{H}_9\text{NO}_3$  requires: C, 66.97; H, 4.22; N, 6.51%).

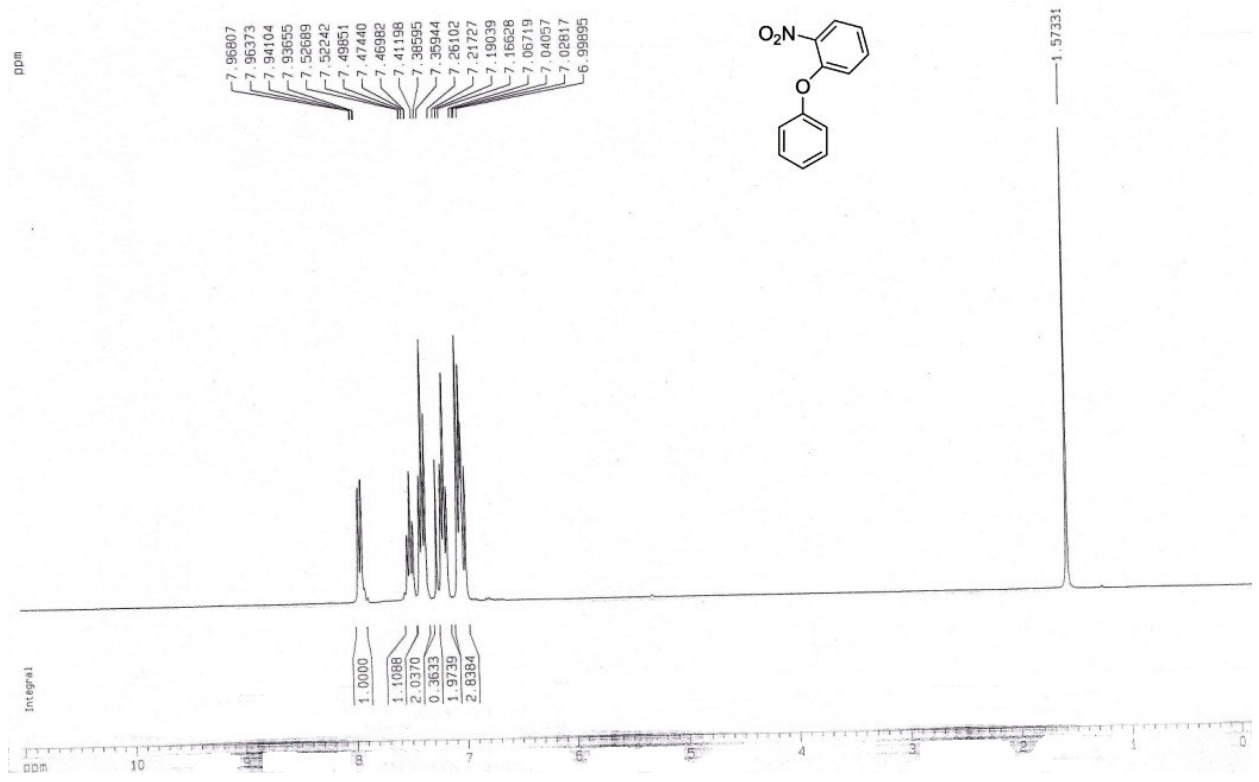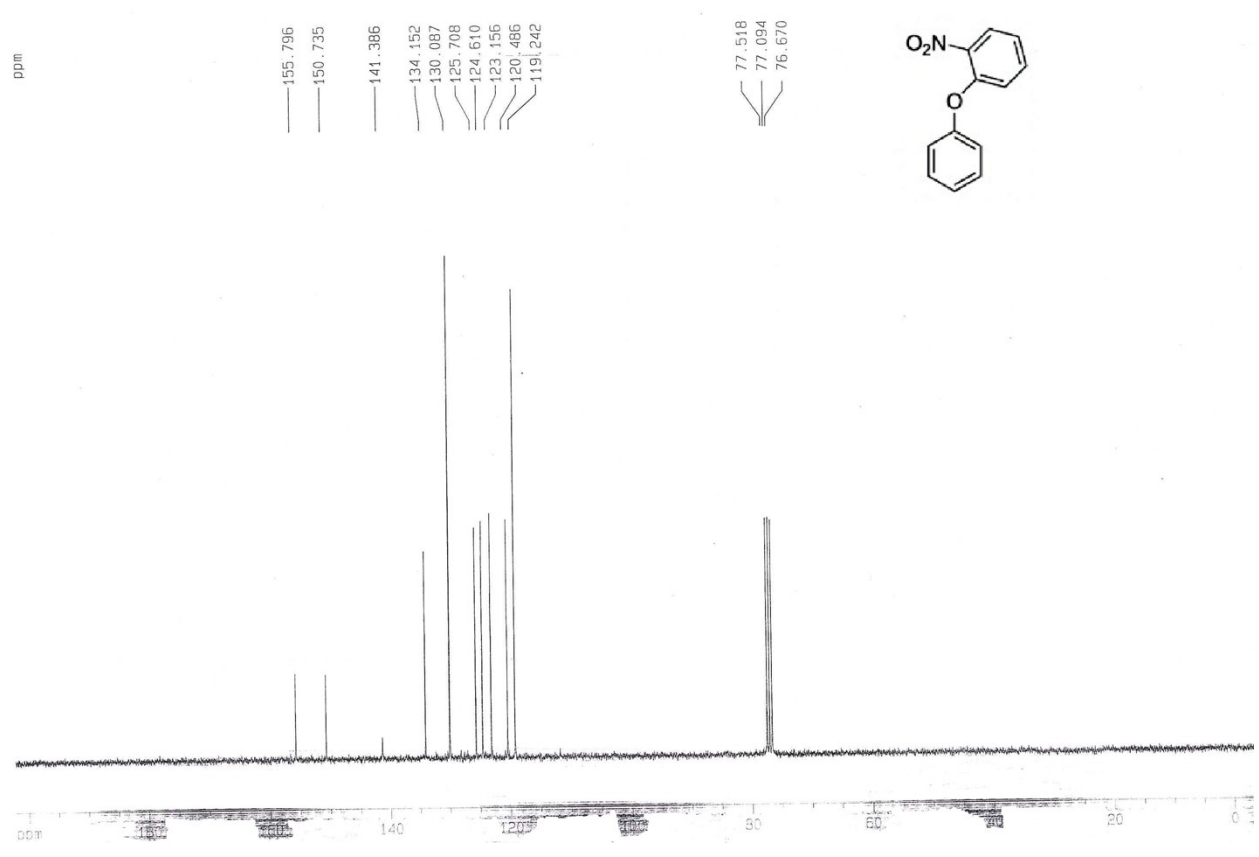

**1c**;  $\delta_H$  (300 MHz,  $CDCl_3$ , ppm) 2.38 (s, 3H), 6.98 (d,  $J = 9.2$  Hz, 4H), 7.22 (d,  $J = 8.2$  Hz, 2H), 8.16–8.19 (m, 2H);  $\delta_C$  (75 MHz;  $CDCl_3$ ) 20.82, 116.76, 120.45, 125.89, 125.93, 130.79, 135.21, 142.46, 152.35, 163.78;  $m/z$  230.0736  $[(M+H)^+]$ , 100%; Elemental analysis (found: C, 68.13; H, 4.86; N, 6.12. for  $C_{13}H_{11}NO_3$  requires: C, 68.11; H, 4.84; N, 6.11%).

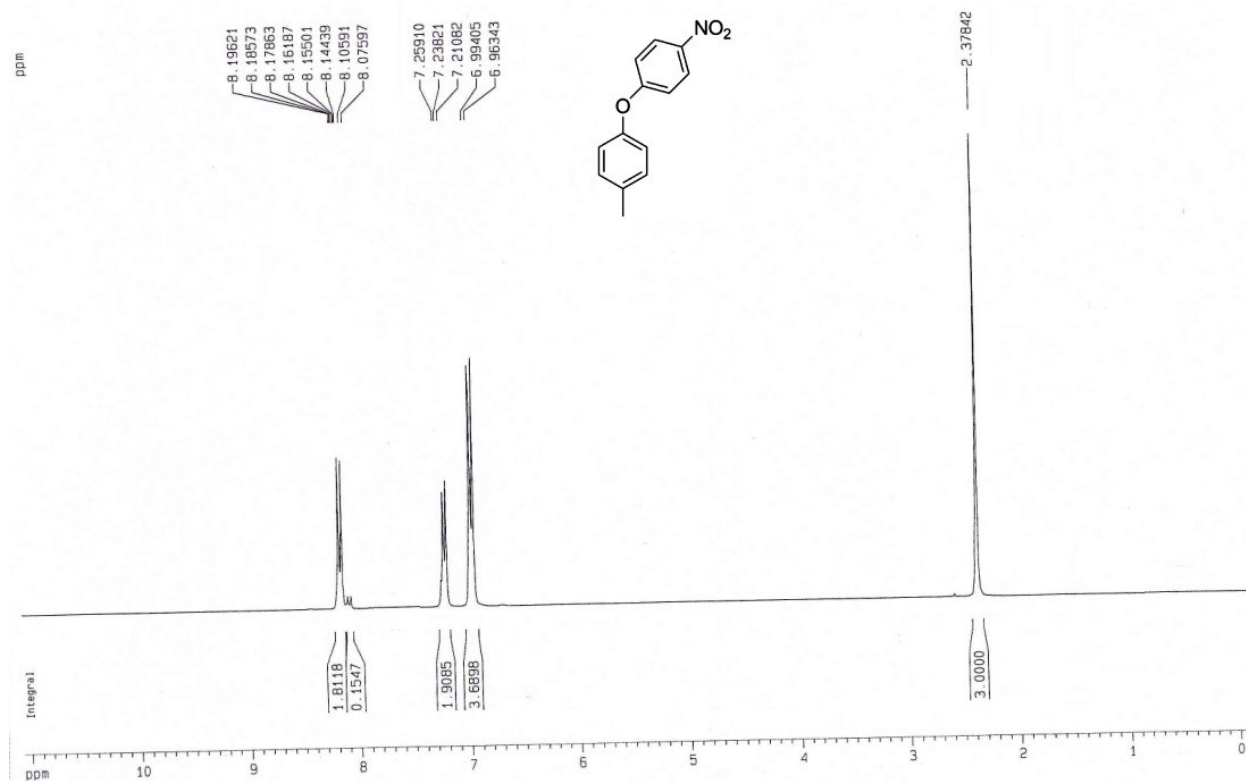

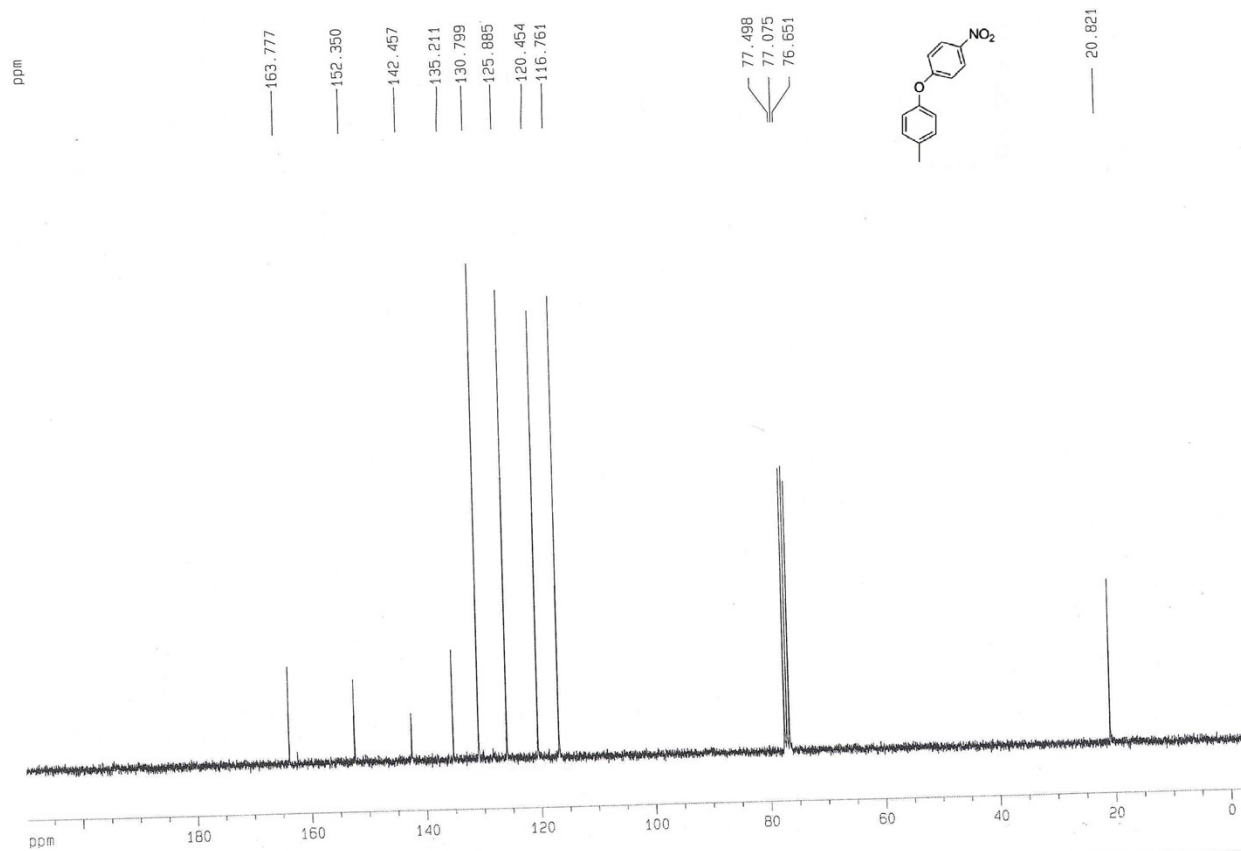

SK-3 9 (0.209) Cm (3:9)

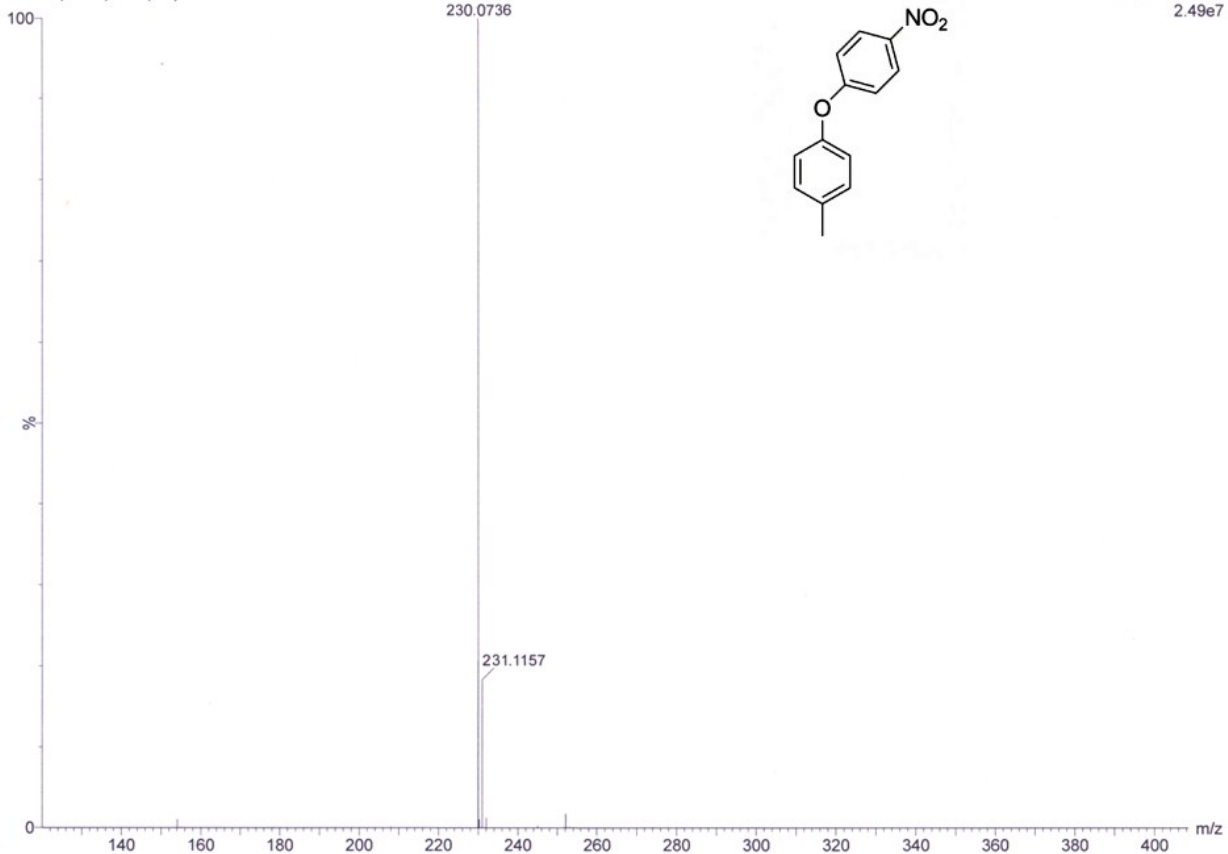

**1d**;  $\delta_{\text{H}}$  (300 MHz,  $\text{CDCl}_3$ , ppm) 2.35 (s, 3H), 6.94–6.98 (m, 3H), 7.13–7.19 (m, 3H), 7.47 (m, 1H), 7.93 (d,  $J = 8.3$  Hz, 1H);  $\delta_{\text{C}}$  (75 MHz;  $\text{CDCl}_3$ ) 20.75, 119.39, 119.85, 122.64, 125.66, 130.56, 133.99, 134.39, 141.13, 151.31, 153.32; Elemental analysis (found: C, 68.15; H, 4.85; N, 6.14. for  $\text{C}_{13}\text{H}_{11}\text{NO}_3$  requires: C, 68.11; H, 4.84; N, 6.11%).

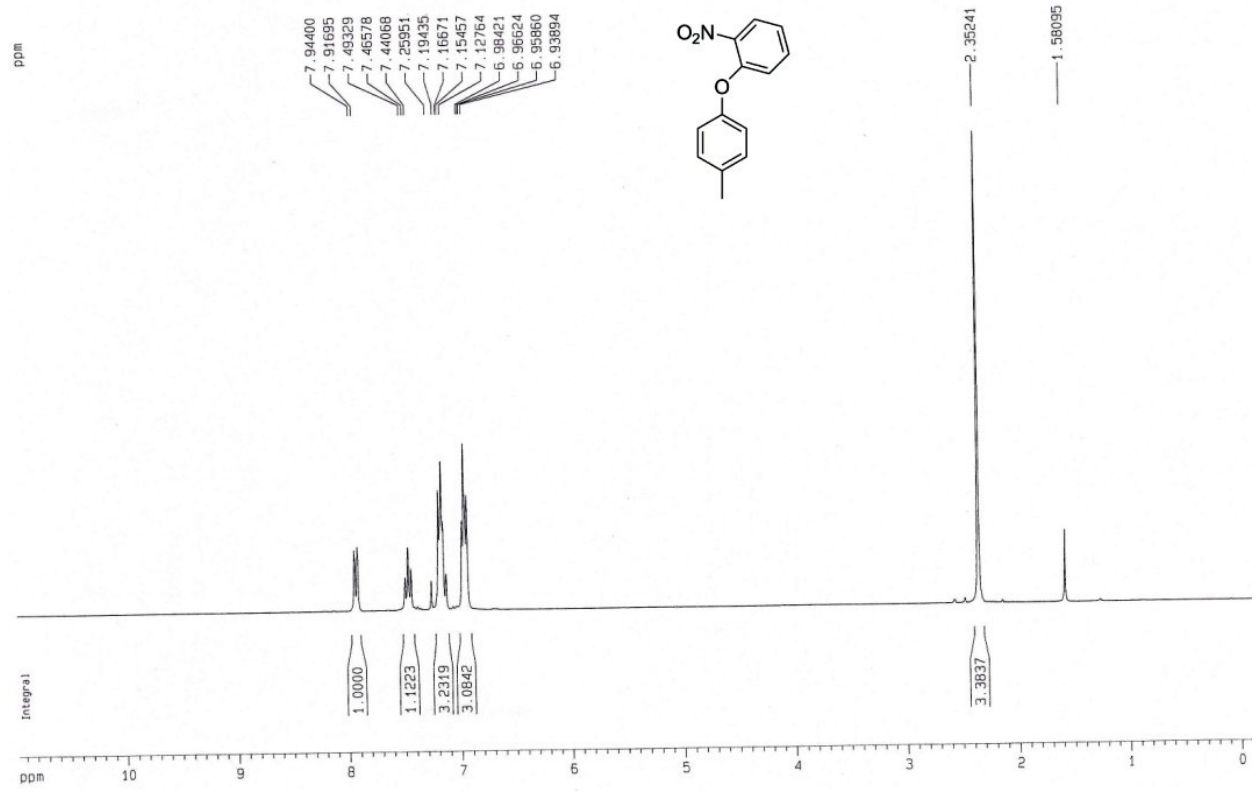

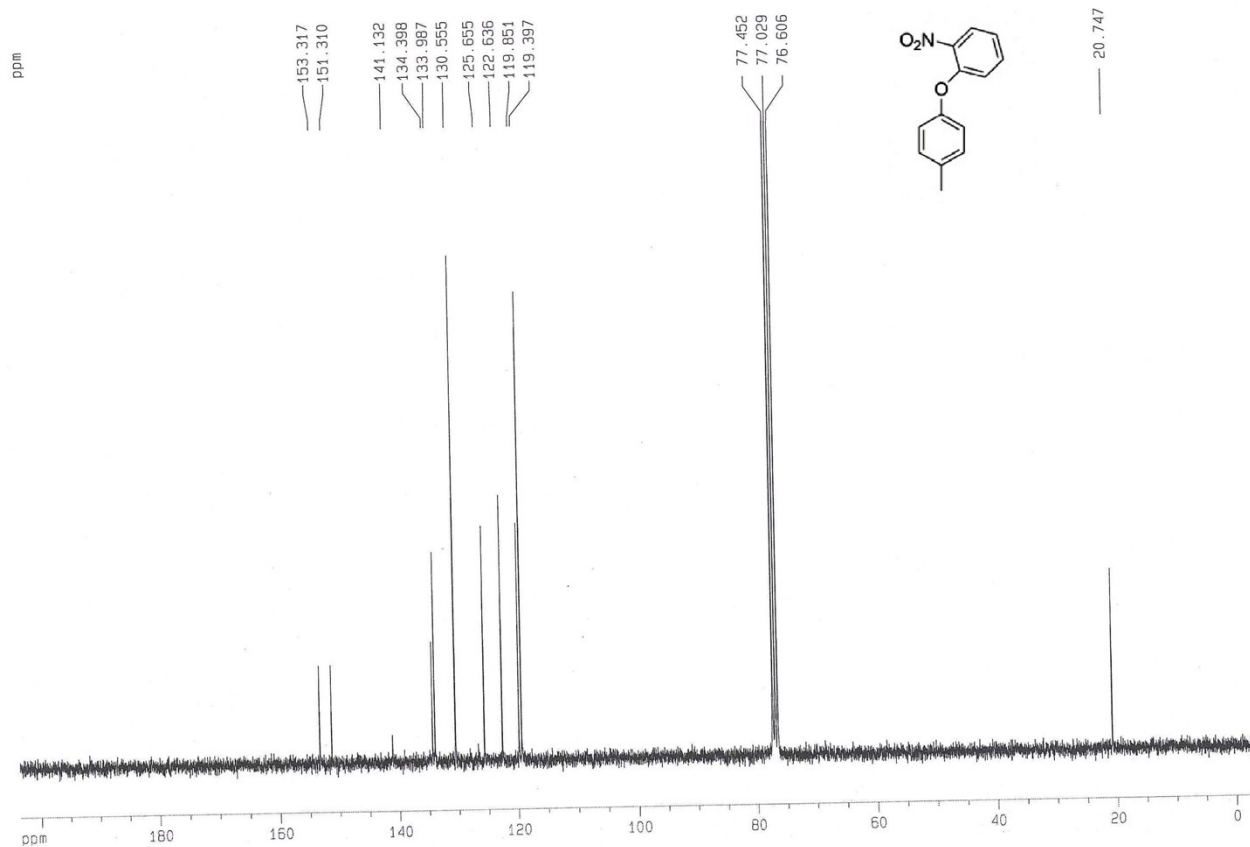

**1e**;  $\delta_{\text{H}}$  (300 MHz,  $\text{CDCl}_3$ , ppm) 3.83 (s, 3H), 6.93–7.03 (m, 6H), 8.17 (d,  $J = 9.2$  Hz, 2H);  $\delta_{\text{C}}$  (75 MHz;  $\text{CDCl}_3$ ) 55.67, 115.31, 116.38, 121.83, 125.89, 142.34, 147.86, 157.19, 164.17;  $m/z$  246.0634 [(M+H)<sup>+</sup>, 100%]; Elemental analysis (found: C, 63.69; H, 4.54; N, 5.73. for  $\text{C}_{13}\text{H}_{11}\text{NO}_4$  requires: C, 63.67; H, 4.52; N, 5.71%).



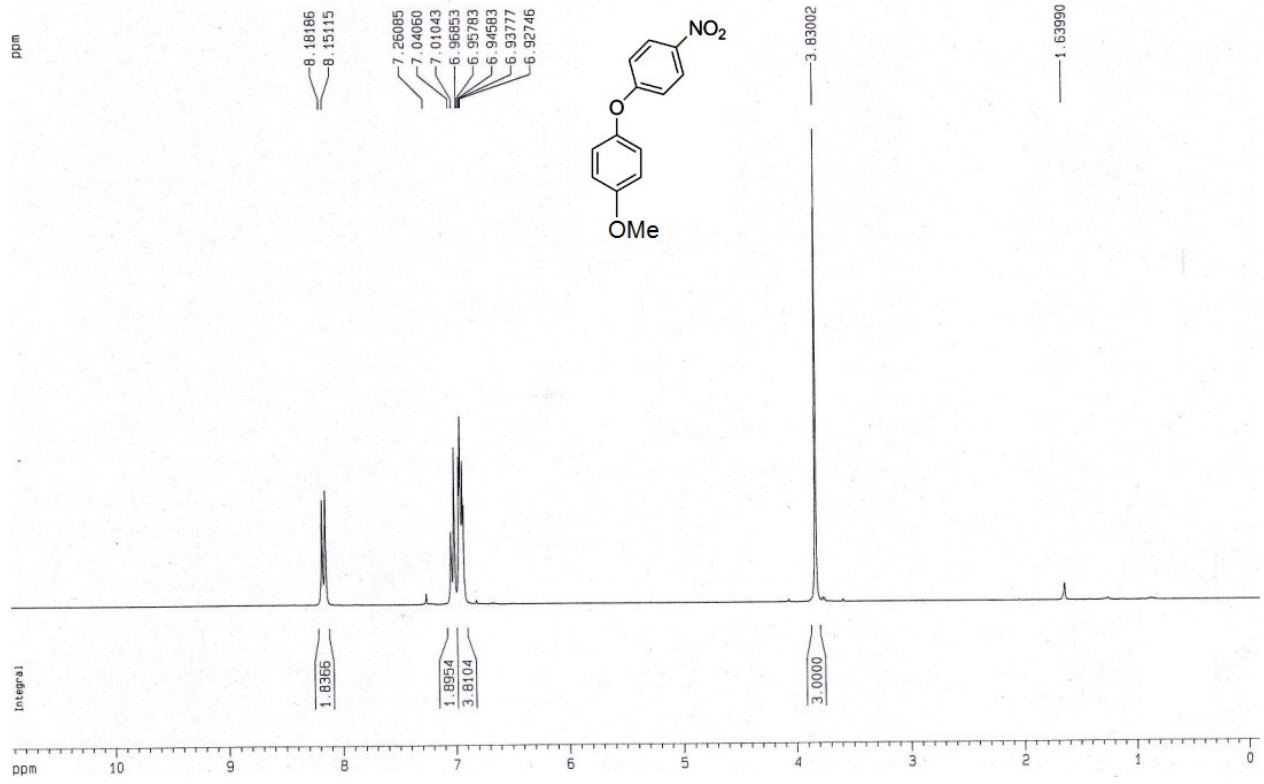

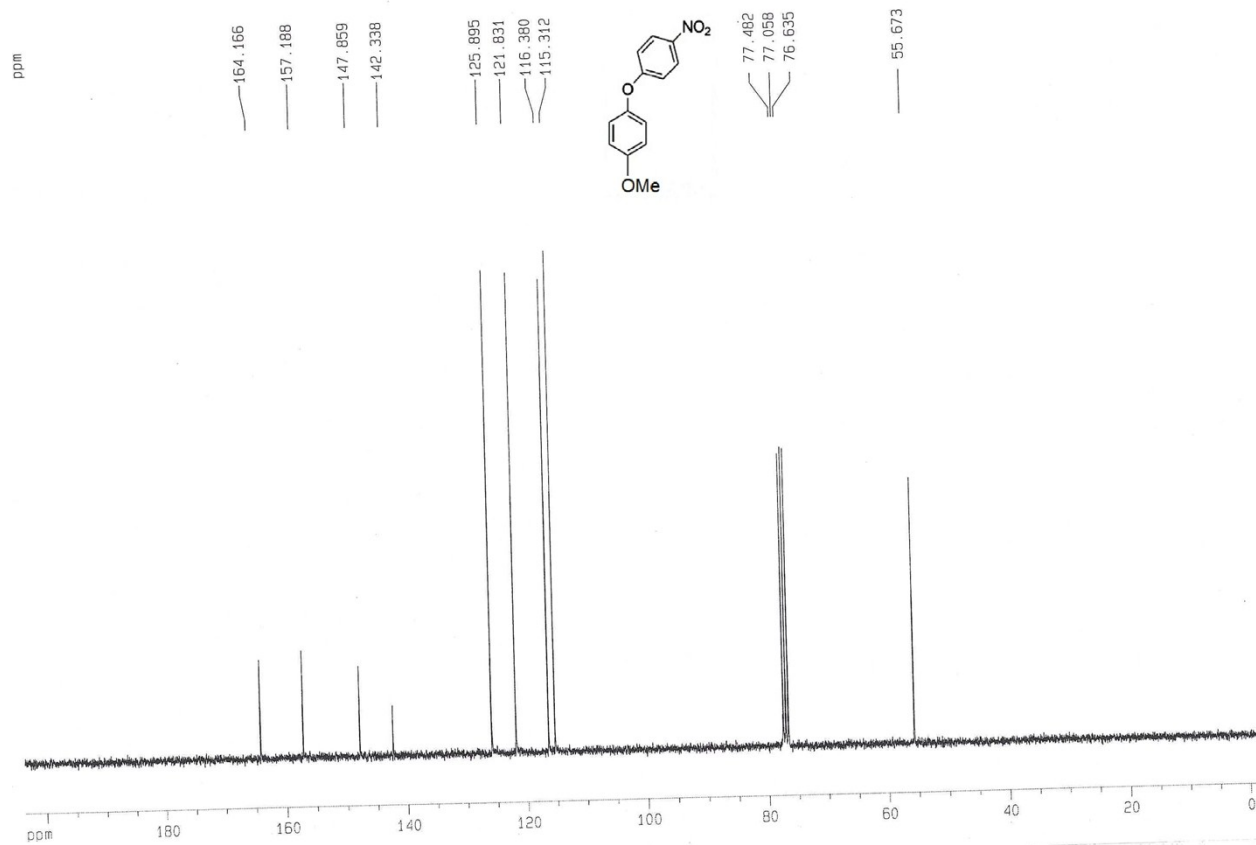

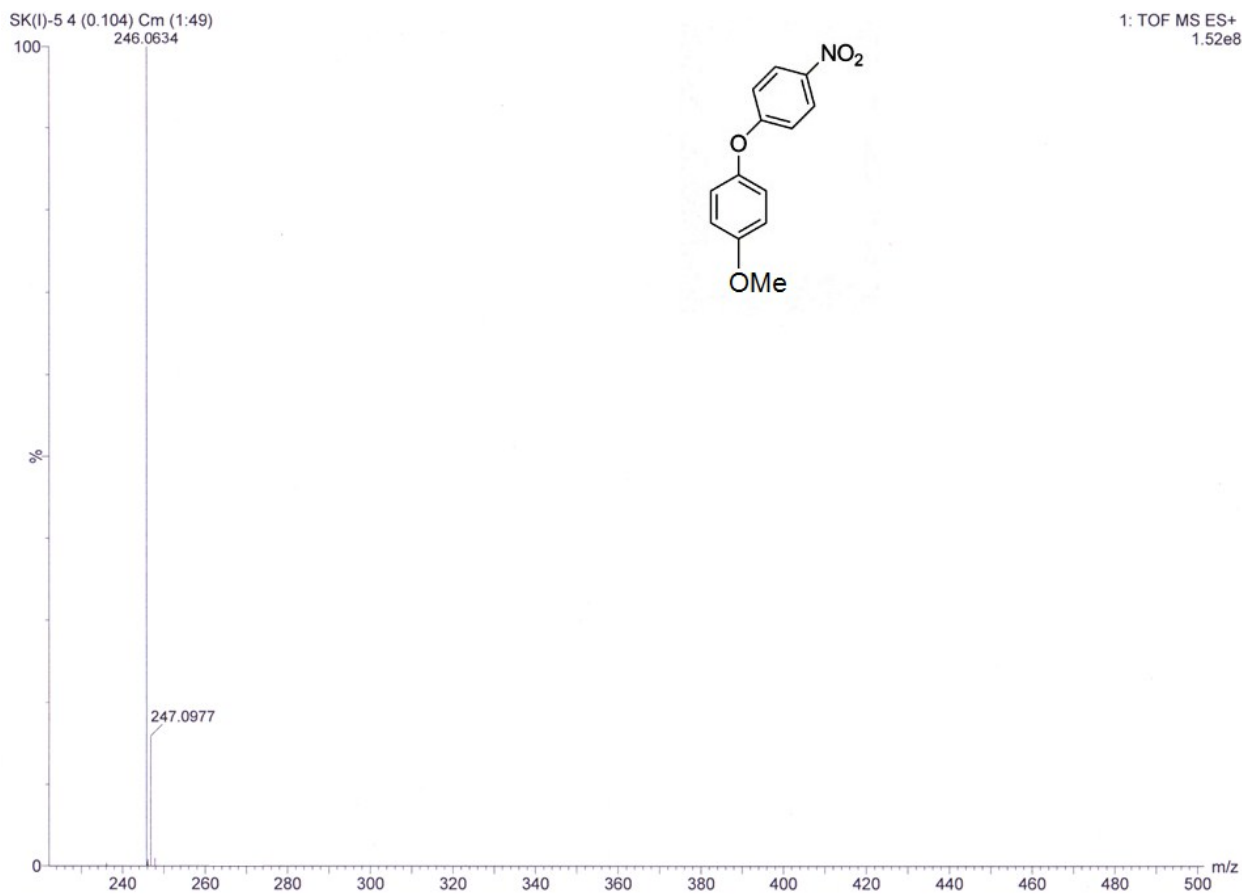

**1f**;  $\delta_H$  (300 MHz;  $\text{CDCl}_3$ ) 2.37 (3H, s), 6.99-6.94 (4H, m), 7.21 (2H, d,  $J = 7.8$  Hz), 7.56 (2H, d,  $J = 8.4$  Hz);  $\delta_C$  (75 MHz;  $\text{CDCl}_3$ ) 20.83, 105.49, 117.59, 117.91, 118.90, 120.39, 129.94, 134.08, 134.92, 152.42, 162.07;  $m/z$  210.0896  $[(M+H)^+]$ , 100%; Elemental analysis (found: C 80.36, H 5.30, N 6.69; for  $\text{C}_{14}\text{H}_{12}\text{O}_2$  requires: C 80.34, H 5.37, N 6.63%).

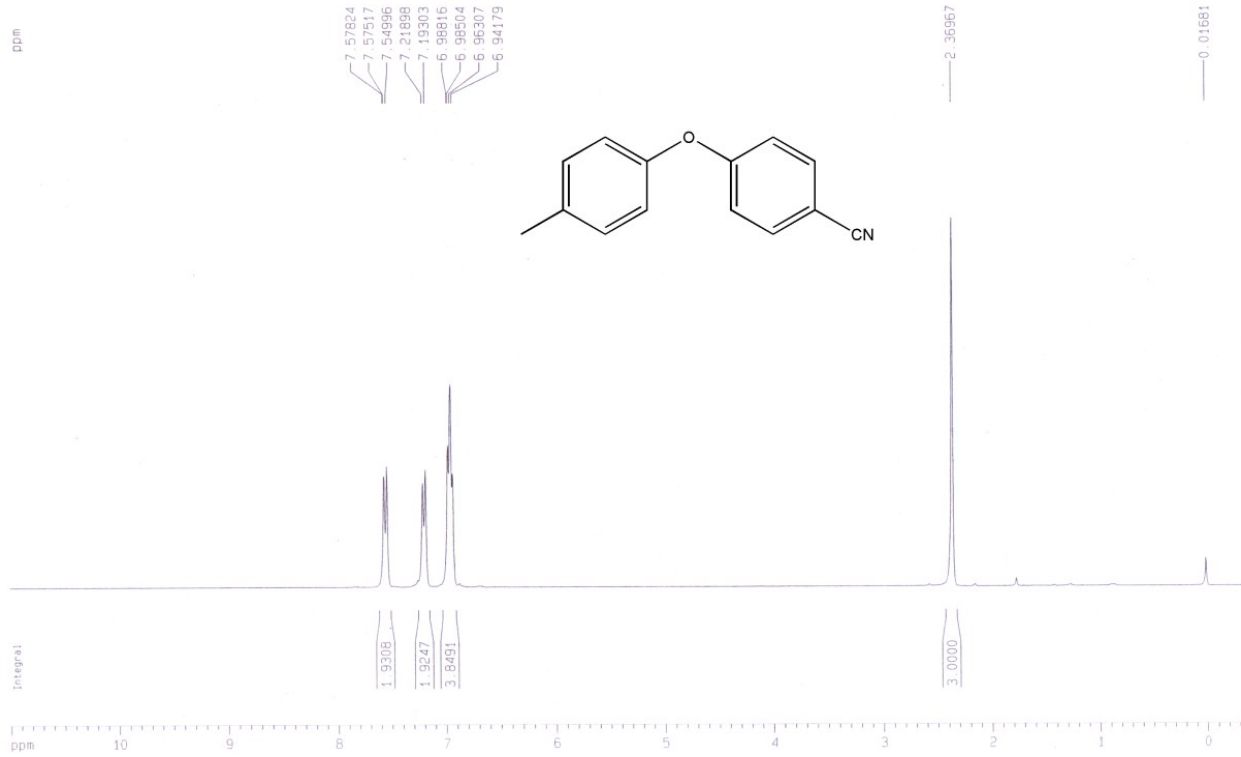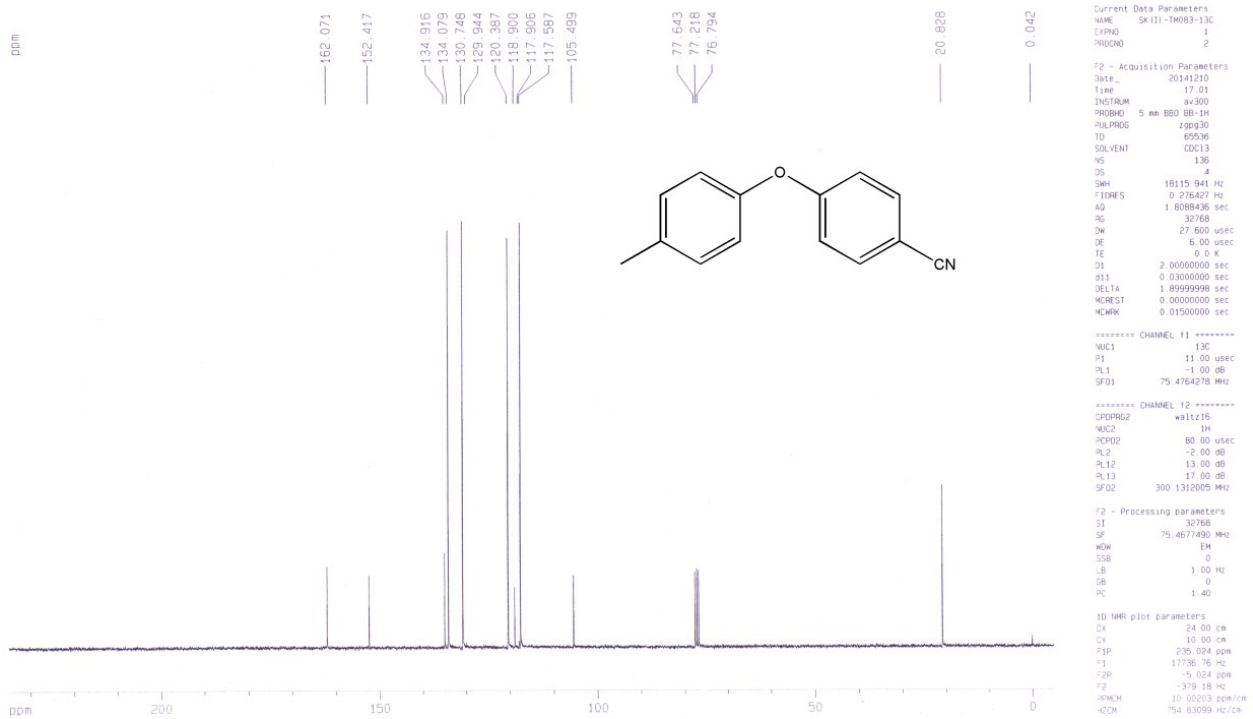

SK(l)-TM-080 25 (0.519) Cm (2:48)

1: TOF MS ES+  
7.44e6

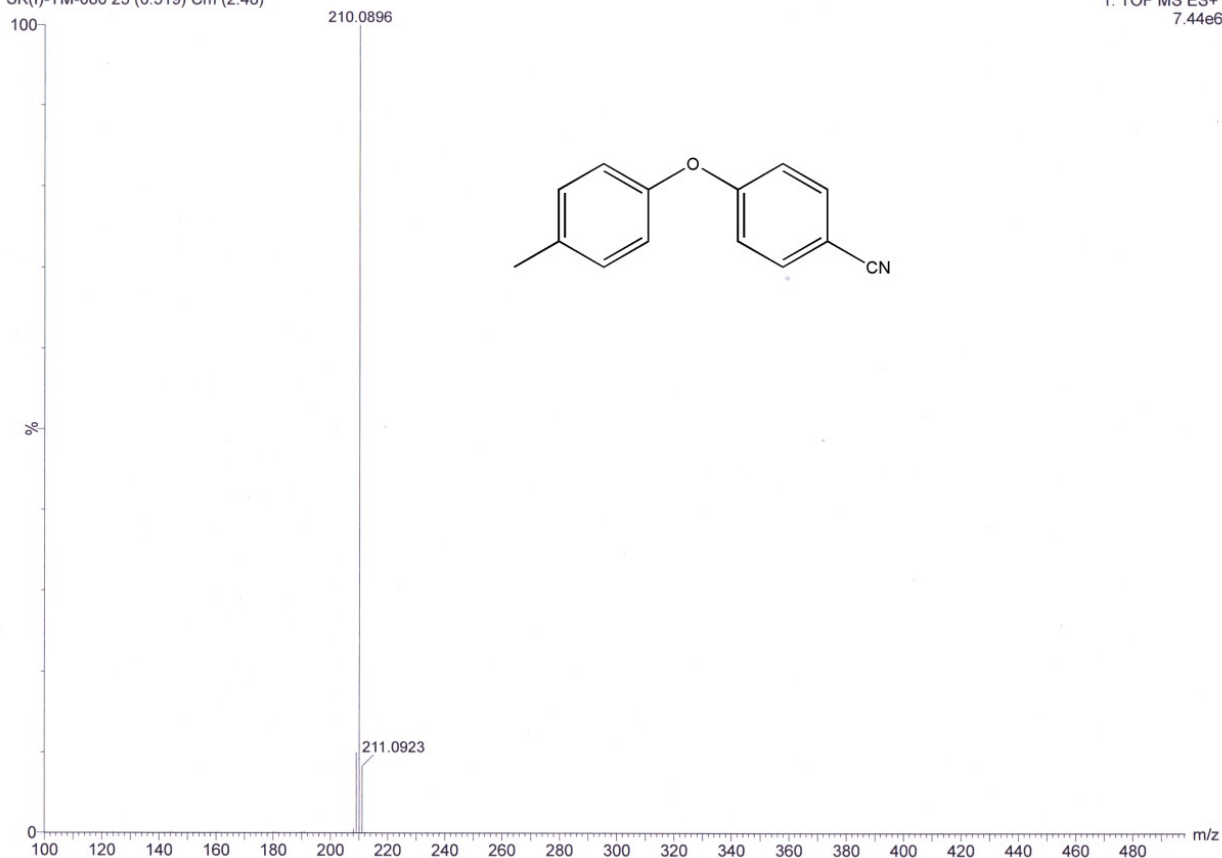

**1g**;  $\delta_H$  (300 MHz;  $CDCl_3$ ) 2.36 (3H, s), 6.85-7.05 (5H, m), 7.29 (1H, t,  $J = 7.6$  Hz), 7.57-7.59 (2H, m);  $\delta_C$  (75 MHz;  $CDCl_3$ ) 21.37, 105.68, 117.34, 117.90, 118.89, 121.04, 125.97, 129.95, 134.10, 140.57, 154.78, 161.79; Elemental analysis (found: C 80.36, H 5.30, N 6.69; for  $C_{14}H_{12}O_2$  requires: C 80.32, H 5.28, N 6.62%).

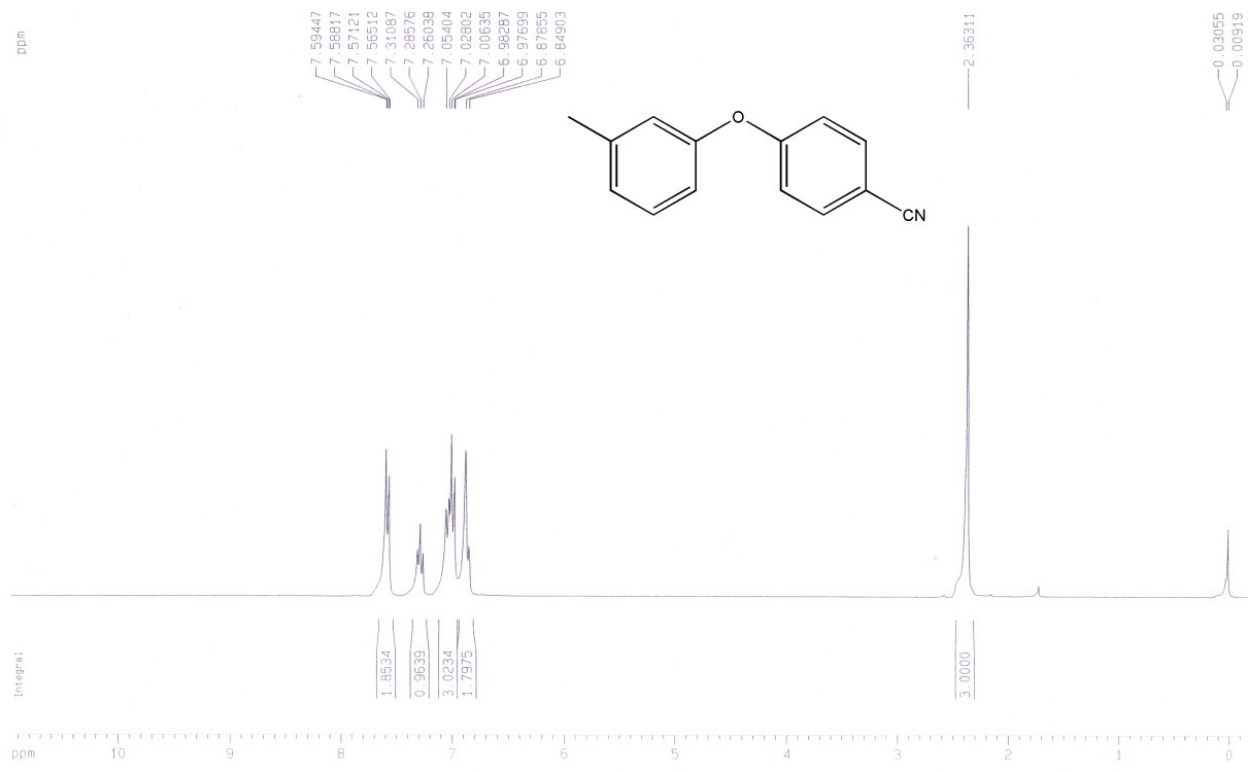

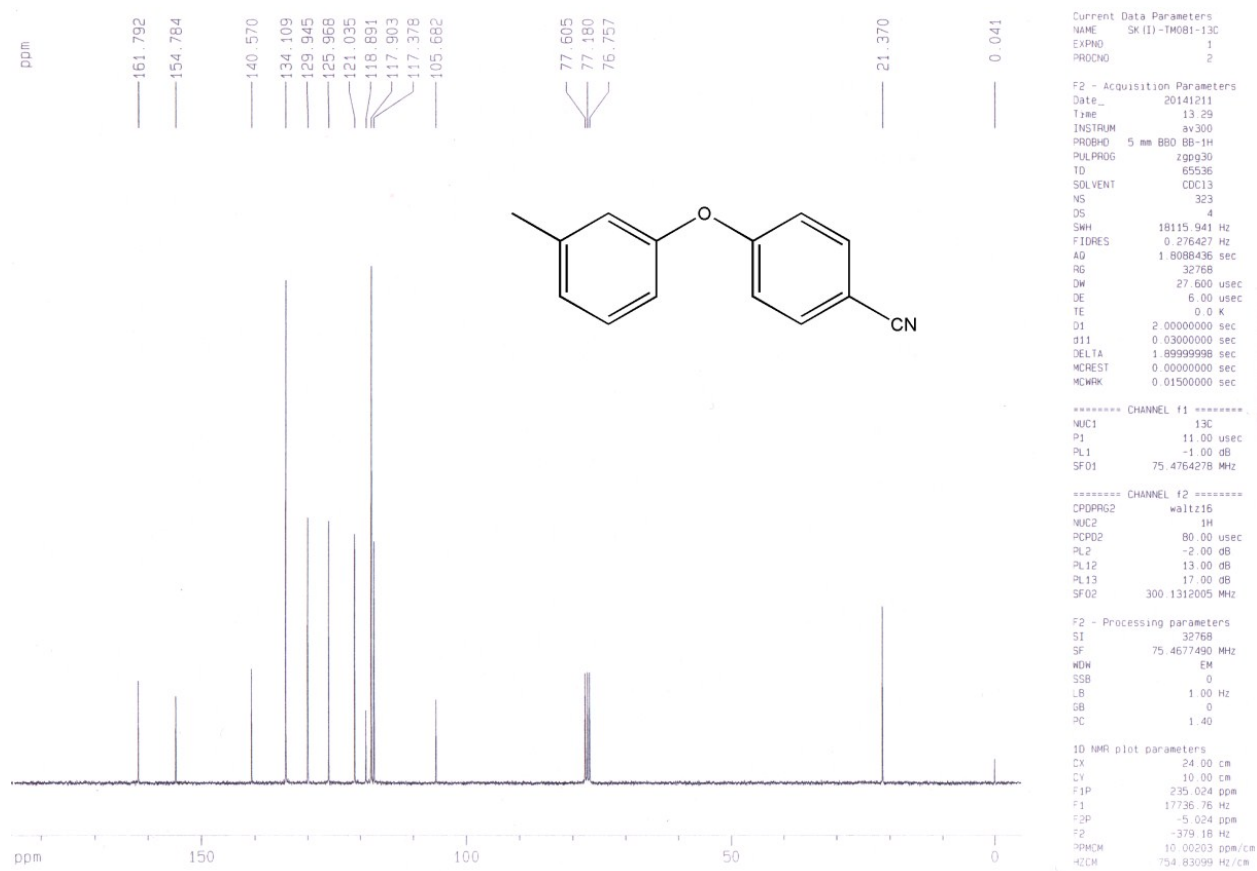

**1h**;  $\delta_H$  (300 MHz;  $\text{CDCl}_3$ ) 2.17 (3H, s), 6.89-6.99 (3H, m), 7.17-7.30 (3H, m), 7.57 (2H, dd,  $J = 1.9$  and  $J = 6.8$  Hz);  $\delta_C$  (75 MHz;  $\text{CDCl}_3$ ) 16.02, 105.29, 116.80, 118.94, 121.10, 125.73, 127.68, 130.55, 131.95, 134.19, 134.58, 152.43, 161.76; Elemental analysis (found: C 80.36, H 5.30, N 6.69; for  $\text{C}_{14}\text{H}_{12}\text{O}_2$  requires: C 80.39, H 5.34, N 6.72%).

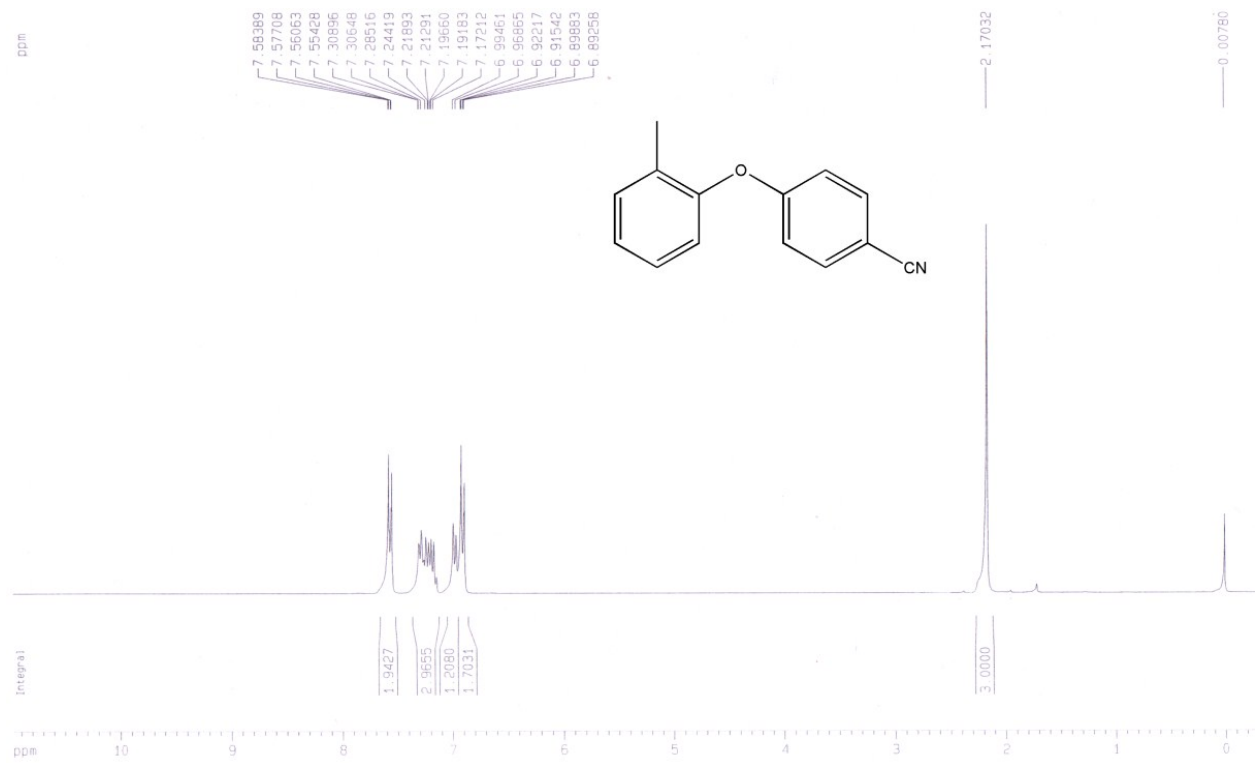



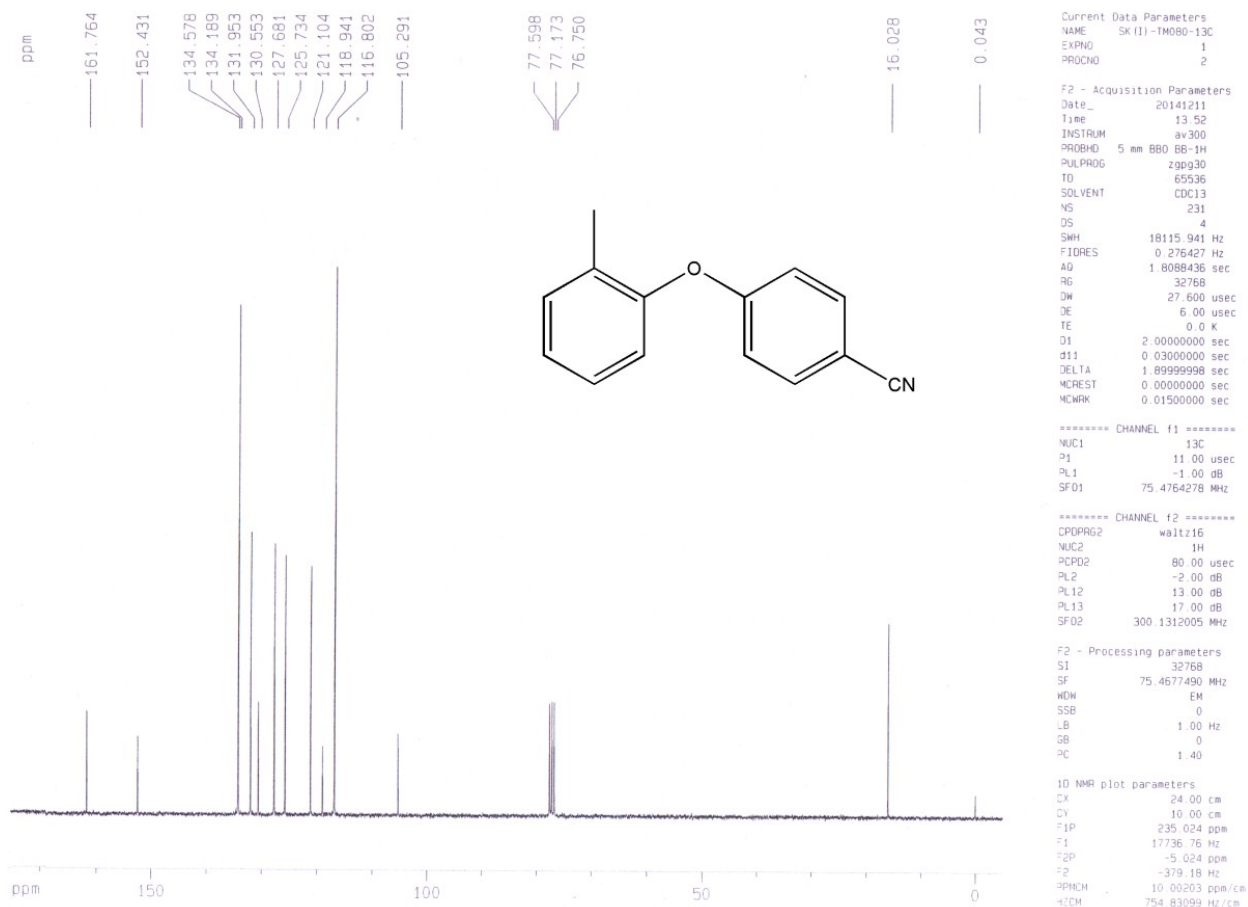

**1i**;  $\delta_H$  (300 MHz;  $CDCl_3$ ) 3.83-3.85 (3H, m), 6.91-7.02 (6H, m), 7.54-7.58 (2H, m);  $\delta_C$  (75 MHz;  $CDCl_3$ ) 55.67, 105.29, 115.25, 117.15, 118.94, 121.80, 134.07, 147.89, 157.03, 162.51;  $m/z$  226.0869 [(M+H)<sup>+</sup>, 100%]; Elemental analysis (found: C 74.65, H 4.92, N 6.22; for  $C_{14}H_{12}O_2$  requires: C 74.62, H 4.97, N 6.20%).

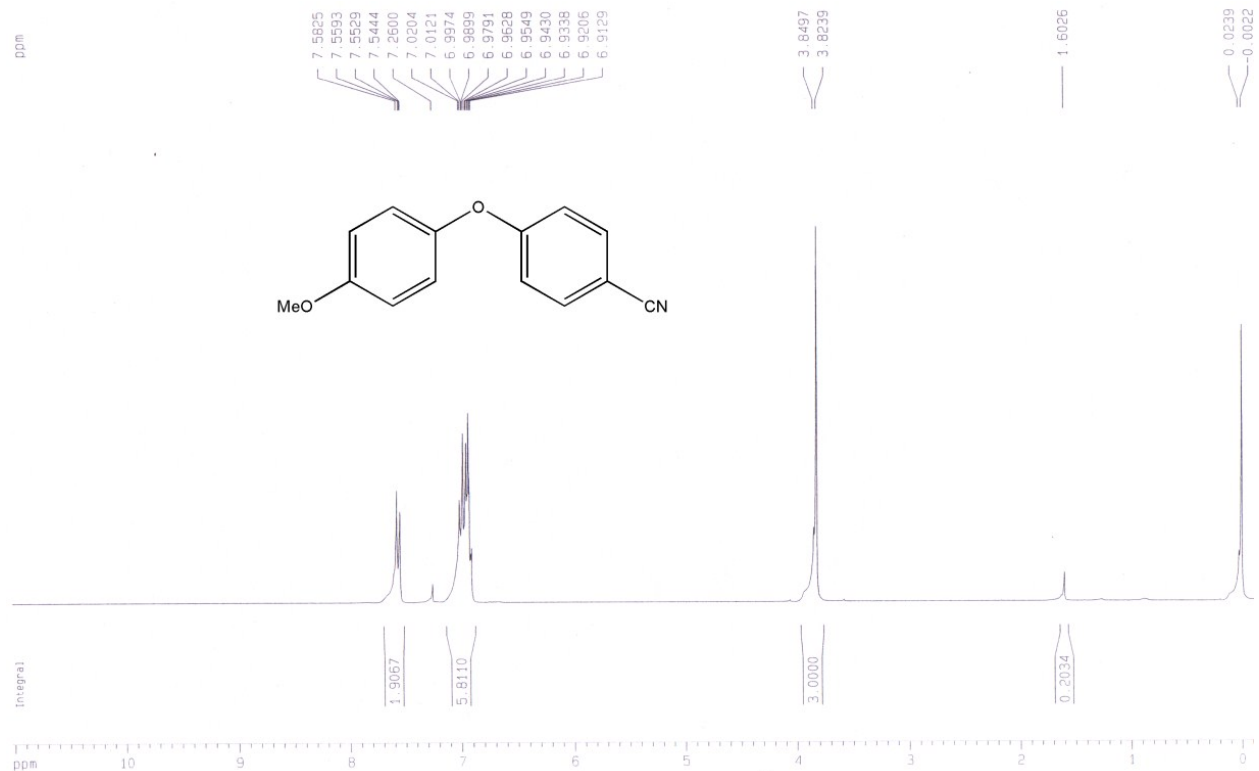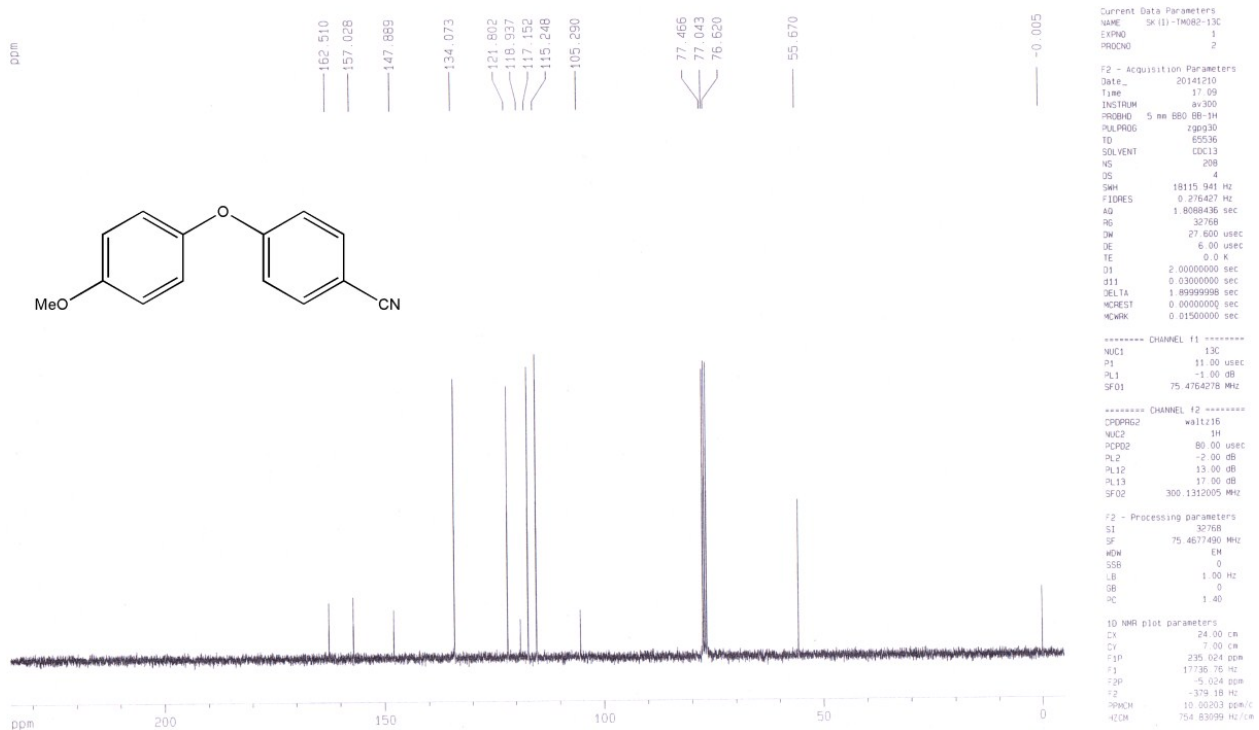

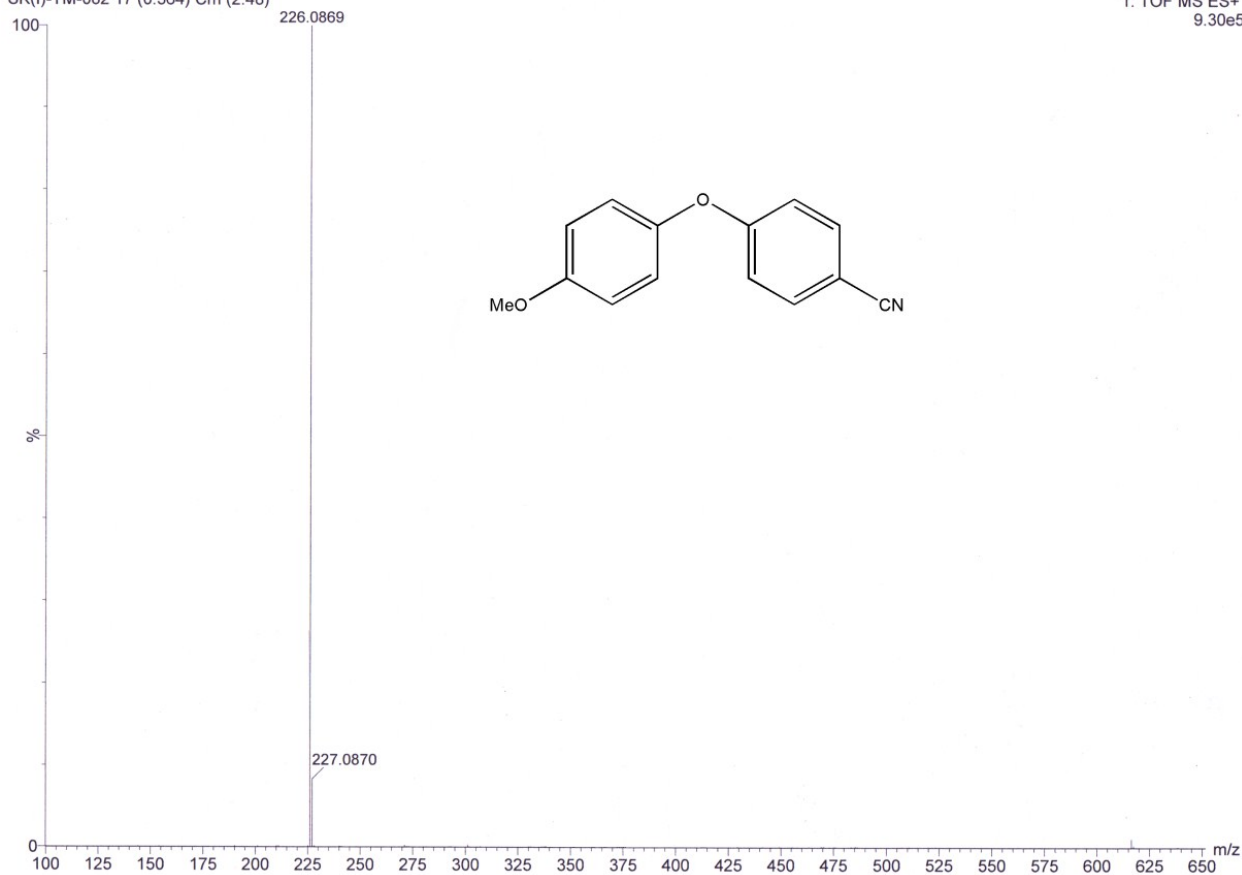

**1j**;  $\delta_H$  (300 MHz;  $CDCl_3$ ) 2.60 (3H, s), 6.99-6.94 (4H, m), 7.09 (4H, dd,  $J = 2.1$  and  $J = 8.7$  Hz), 7.66 (2H, d,  $J = 8.7$  Hz), 8.01 (2H, d,  $J = 8.7$  Hz);  $\delta_C$  (75 MHz;  $CDCl_3$ ) 26.54, 107.32, 118.47, 119.24, 130.84, 133.65, 134.36, 159.36, 160.06, 196.57;  $m/z$  238.0817 [(M+H)<sup>+</sup>, 100%]; Elemental analysis (found: C 75.94, H 4.67, N 5.90; for  $C_{14}H_{12}O_2$  requires: C 75.98, H 4.69, N 5.93%).

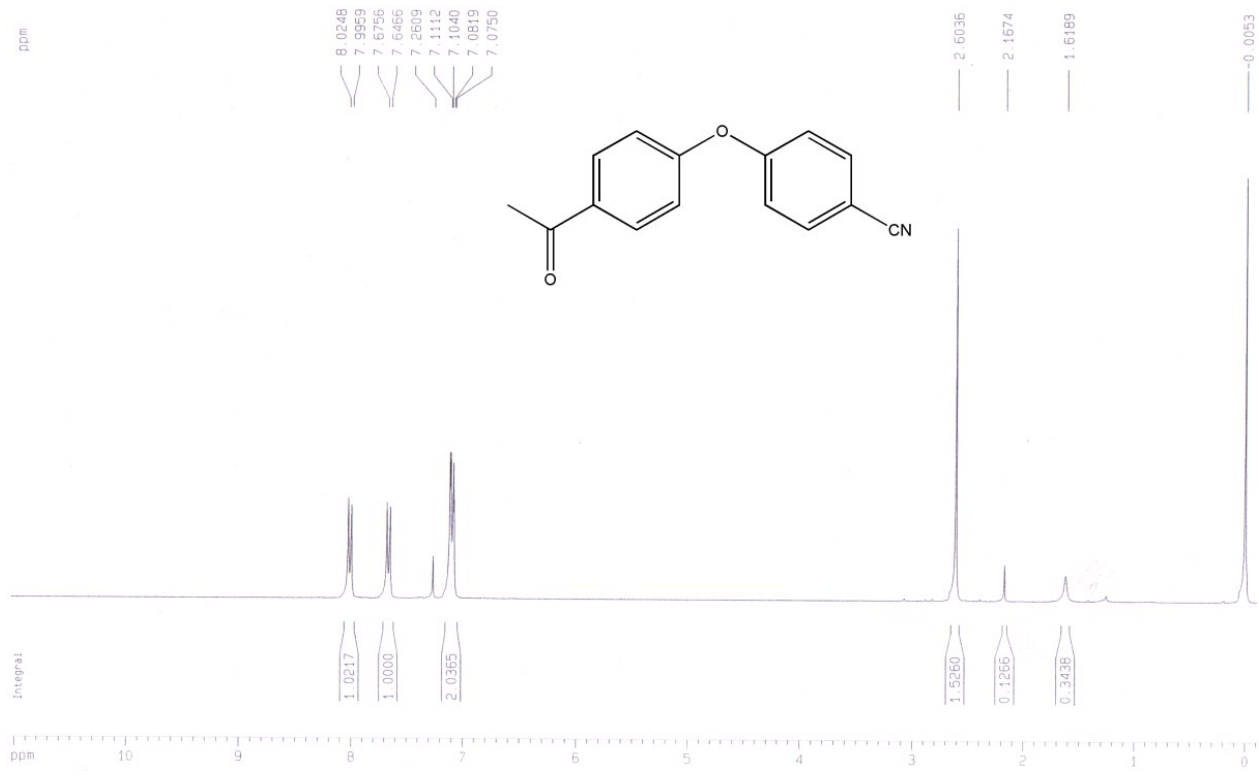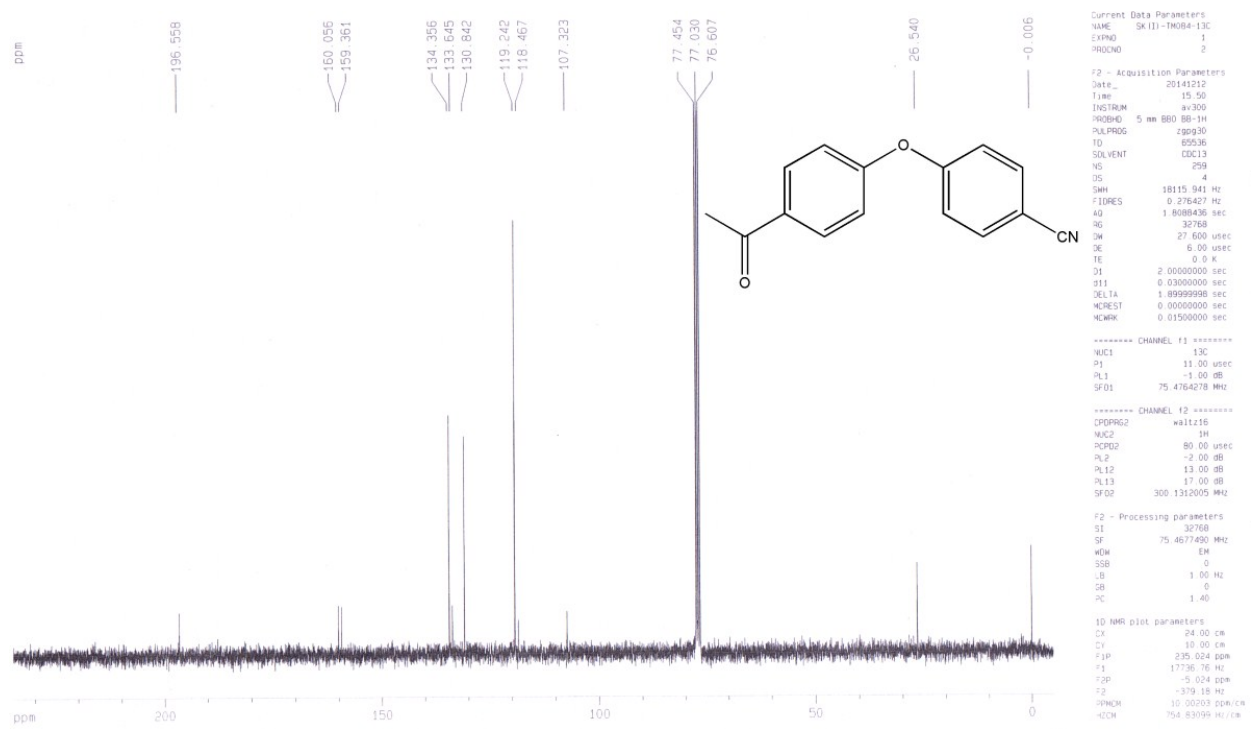

SK(l)-TM-O-84 8 (0.172) Cm (2:44)

1: TOF MS ES+  
2.44e6

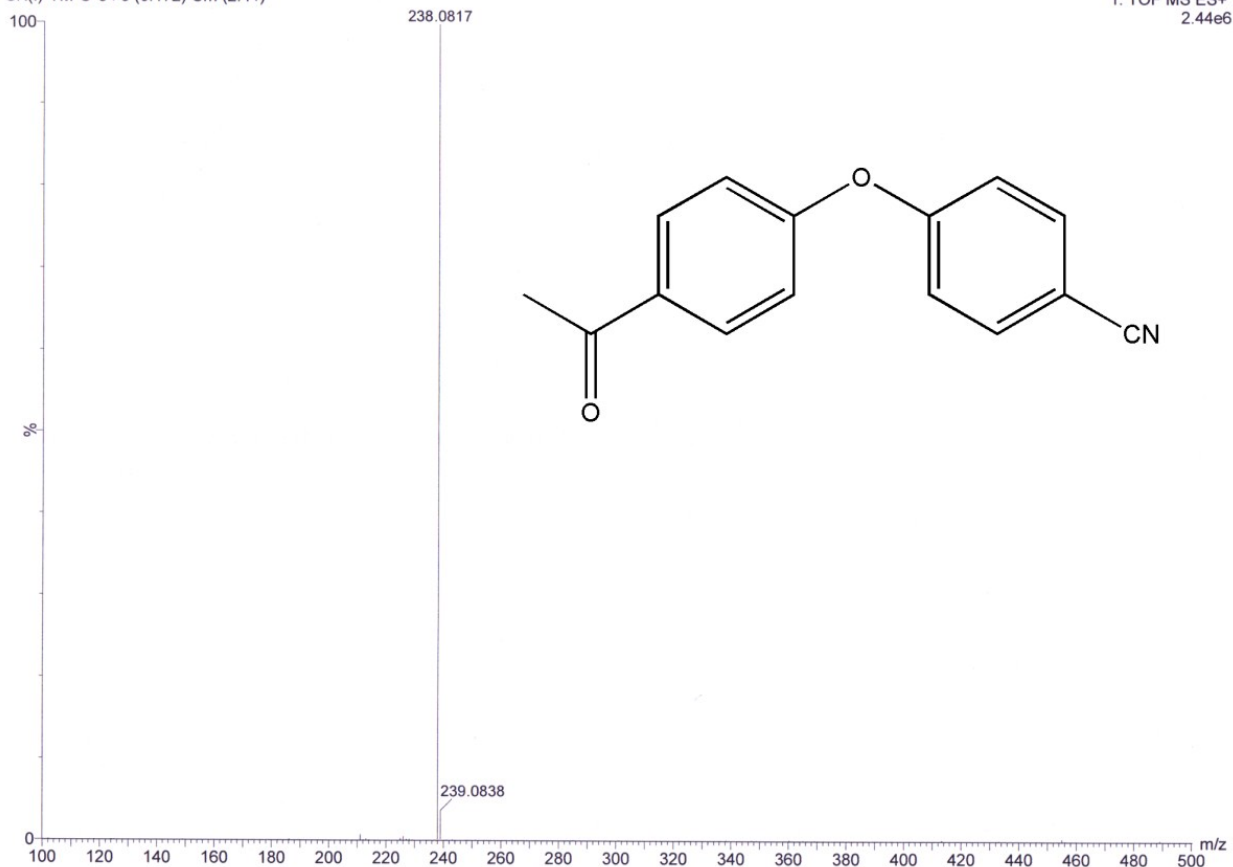

**1k**;  $\delta_H$  (300 MHz;  $CDCl_3$ ) 6.97-7.03 (4H, m), 7.13-7.19 (1H, m), 7.34 (2H, t,  $J = 7.8$  Hz), 7.77 (2H, d,  $J = 8.4$  Hz), 9.85 (1H, s);  $\delta_C$  (75 MHz;  $CDCl_3$ ) 117.61, 120.40, 125.91, 130.14, 131.33, 131.93, 132.34, 155.17, 163.24, 190.71;  $m/z$  199.0889  $[(M+H)^+]$ , 100%; Yield ca. 93% based on

amine; Elemental analysis (found: C 78.79, H 5.10; for C<sub>13</sub>H<sub>10</sub>O<sub>2</sub> requires: C 78.77, H 5.09%).

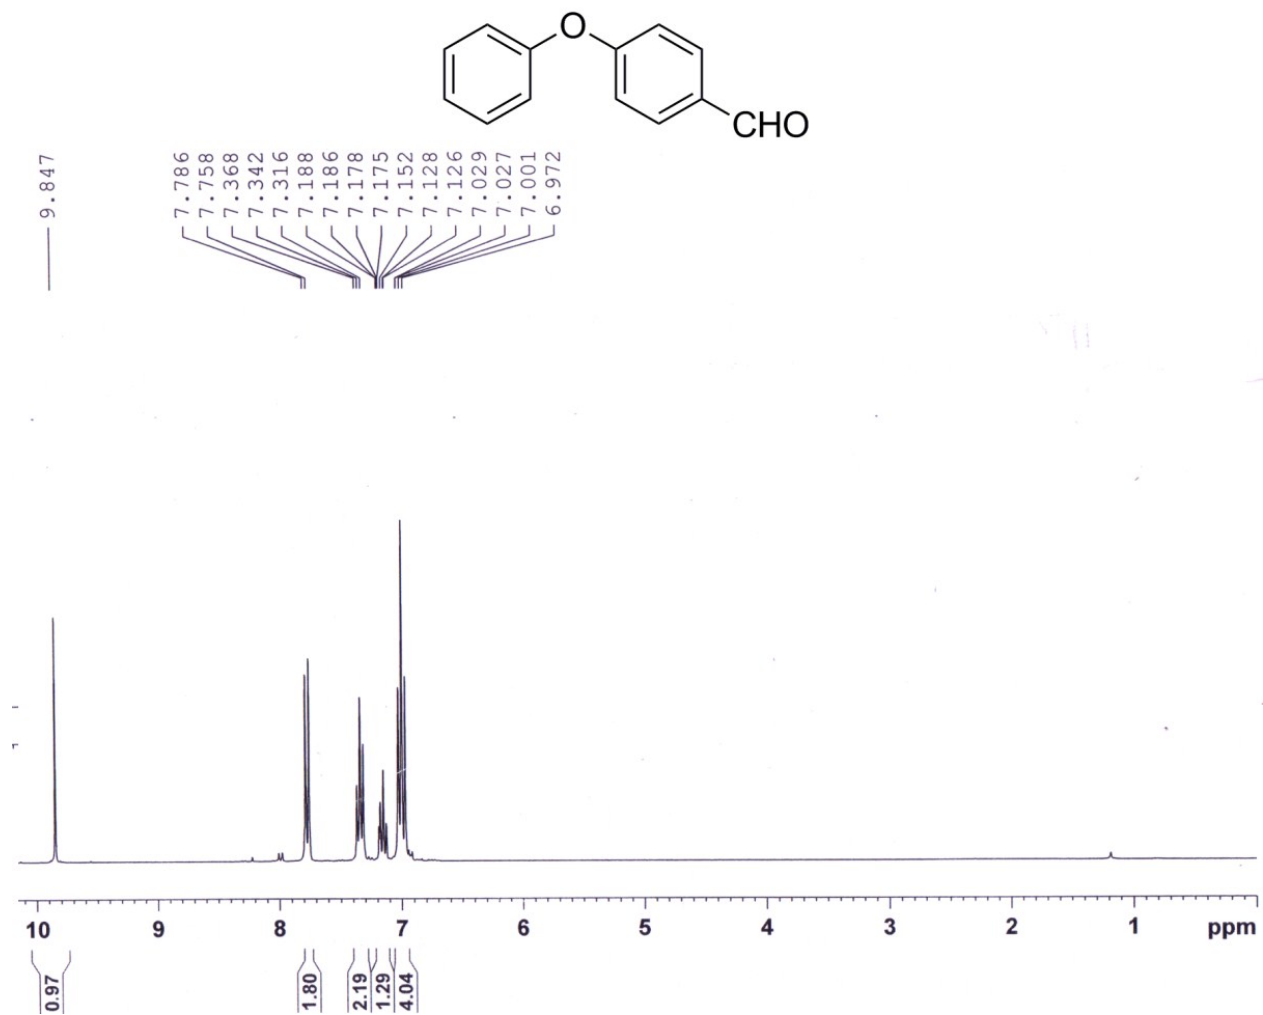

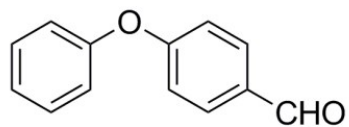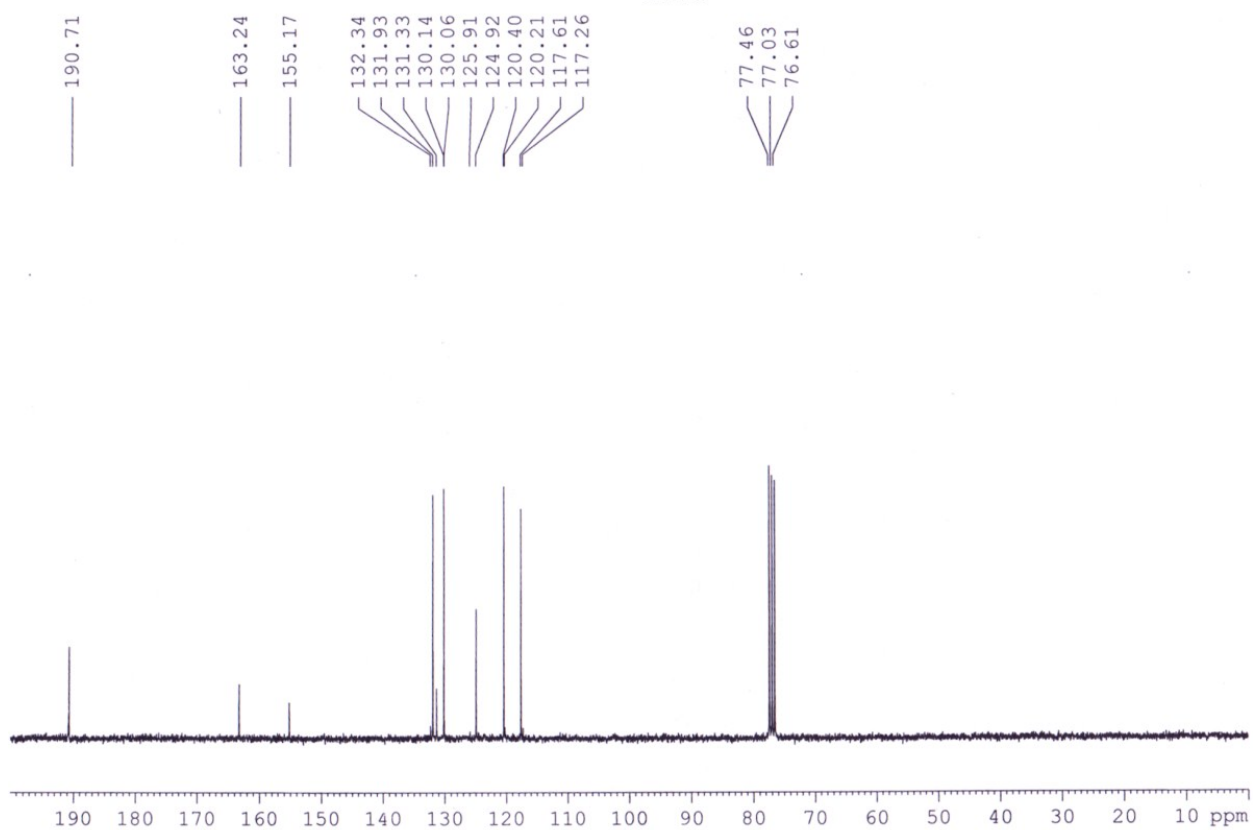

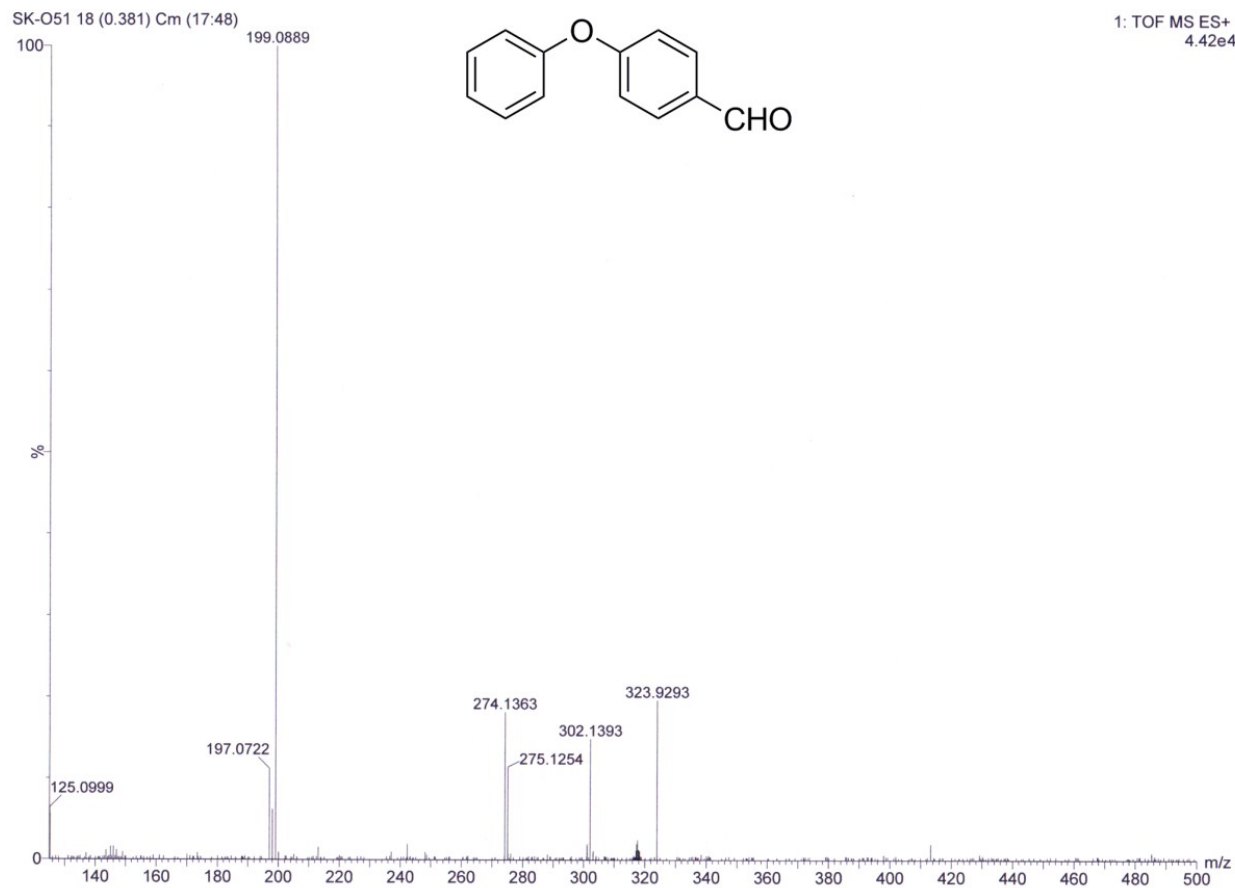

**11**;  $\delta_H$  (300 MHz;  $\text{CDCl}_3$ ) 2.37 (3H, s), 6.96-7.04 (4H, m), 7.21 (2H, d,  $J = 8.2$  Hz), 7.82 (2H, d,  $J = 8.6$  Hz), 9.90 (1H, s);  $\delta_C$  (75 MHz;  $\text{CDCl}_3$ ) 20.81, 116.19, 117.23, 117.57, 120.39, 121.05, 130.64, 131.09, 131.90, 134.69, 152.72, 163.67, 190.69;  $m/z$  213.0905 [(M+H)<sup>+</sup>, 100%]; Elemental analysis (found: C 79.25, H 5.72; for  $\text{C}_{14}\text{H}_{12}\text{O}_2$  requires: C 79.22, H 5.70%).



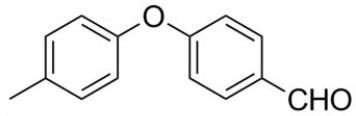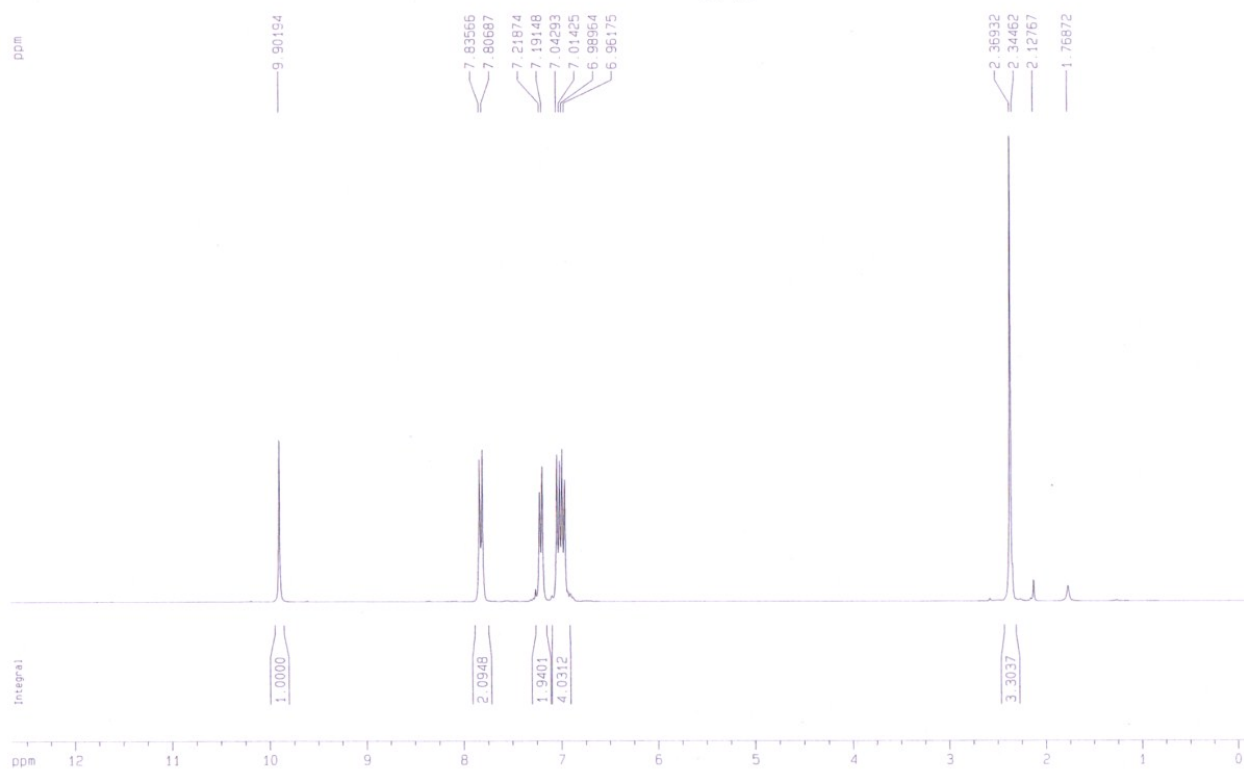

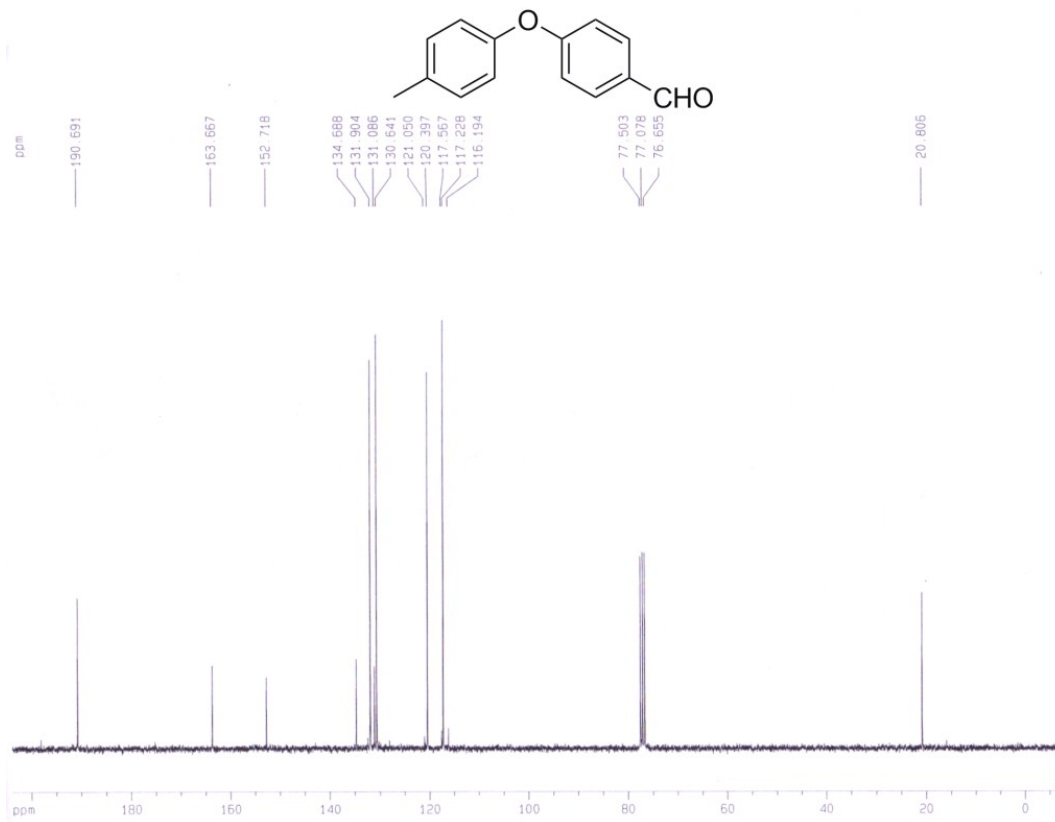

```

Current Data Parameters
NAME SK111-1M050-13C
EXPNO 1
PROCNO 2

F2 - Acquisition Parameters
Date_ 20140513
Time 16.08
INSTRUM av300
PROBHD 5 mm BBO BB-1H
PULPROG zgpg30
TD 65536
SOLVENT CDCl3
NS 208
DS 4
SWH 16556.291 Hz
FIDRES 0.252629 Hz
AQ 1.9782372 sec
RG 18390.4
DW 30.200 usec
DE 6.00 usec
TE 0.0 K
D1 2.0000000 sec
d11 0.0300000 sec
DELTA 1.8999998 sec
INCRST 0.0000000 sec
MCORR 0.0150000 sec

***** CHANNEL f1 *****
NUC1 13C
P1 11.00 usec
PL1 -1.00 dB
SFO1 75.475268 MHz

***** CHANNEL f2 *****
CPROG2 waltz16
NUC2 1H
PCPD2 80.00 usec
PL2 -2.00 dB
PL12 13.00 dB
PL13 17.00 dB
SFO2 300.1312005 MHz

F2 - Processing parameters
SI 32768
SF 75.4677490 MHz
WDW EM
SSB 0
LB 1.00 Hz
GB 0
PC 1.40

1D NMR plot parameters
CX 24.00 cm
CY 10.00 cm
F1P 203.893 ppm
F1 15387.31 Hz
F2P -6.792 ppm
F2 -512.56 Hz
PPM0 8.77851 ppm/cm
HZCM 662.49481 Hz/cm

```

SK-SB-1 41 (0.829) Cm (11.47)  
213.0905

1: TOF MS ES+  
5.26e6

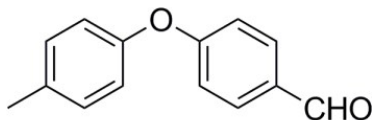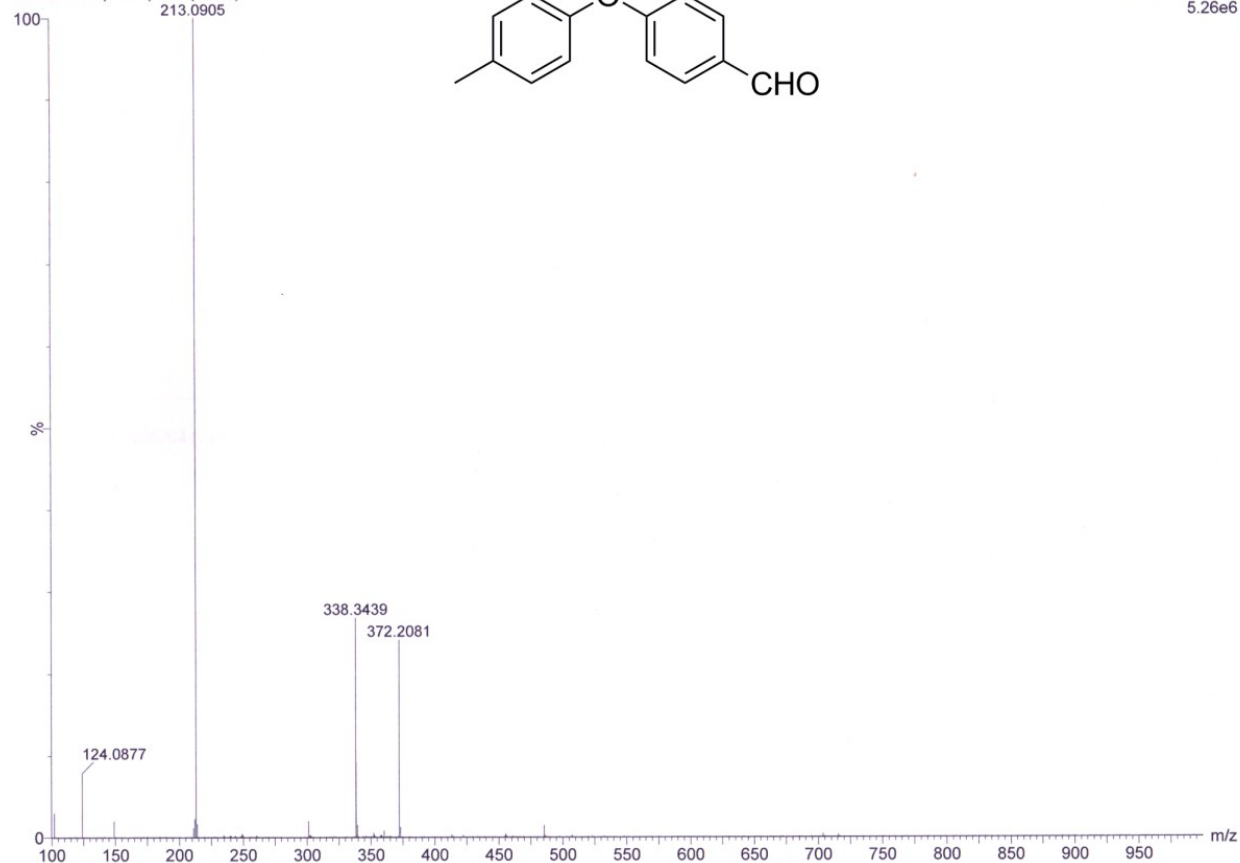

**1m**;  $\delta_H$  (300 MHz; CDCl<sub>3</sub>, TMS) 2.39 (3H, s), 6.91 (2H, d,  $J = 8.3$  Hz), 7.05-7.09 (3H, m), 7.31 (1H, t,  $J = 7.6$  Hz), 7.85-7.88 (2H, m), 9.94 (1H, s);  $\delta_C$  (75 MHz; CDCl<sub>3</sub>, TMS) 21.36, 117.39, 117.56, 121.05, 125.76, 129.85, 131.21, 131.92, 140.45, 155.08, 163.37, 190.73; Elemental analysis (found: C 79.24, H 5.71; for C<sub>14</sub>H<sub>12</sub>O<sub>2</sub> requires: C 79.22, H 5.70%).

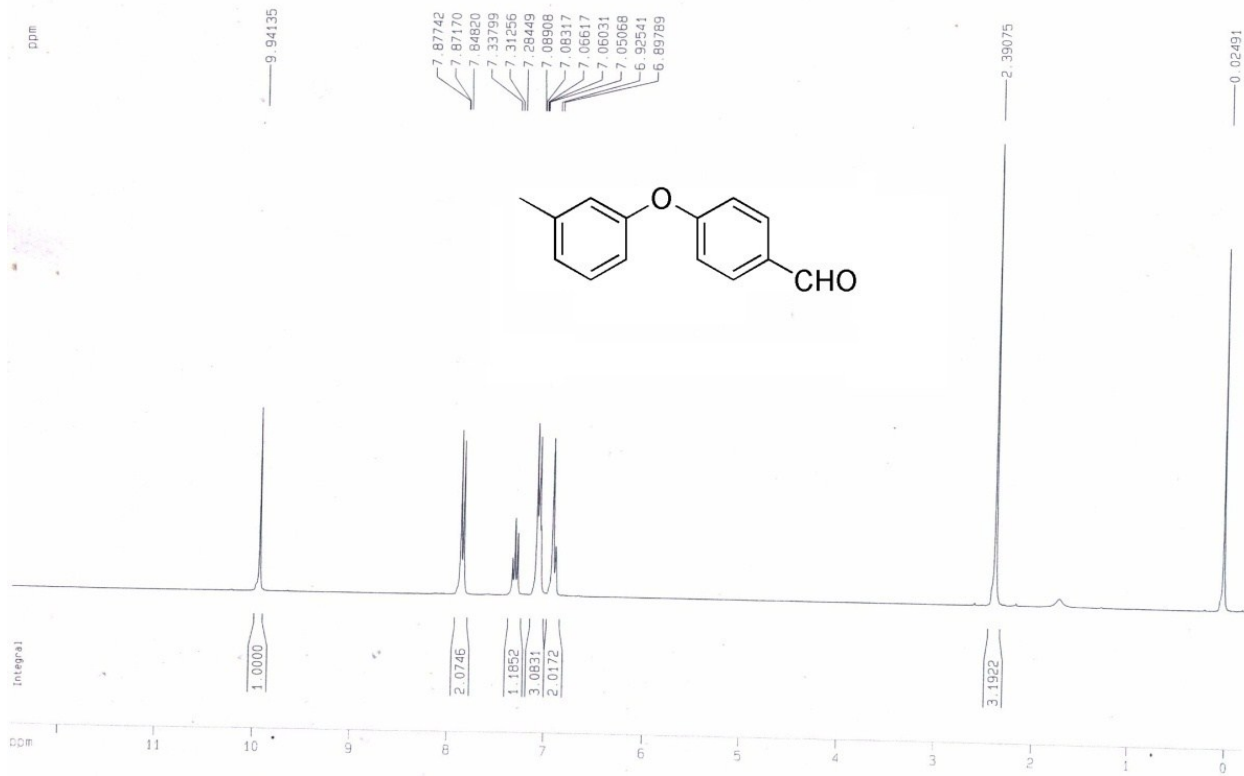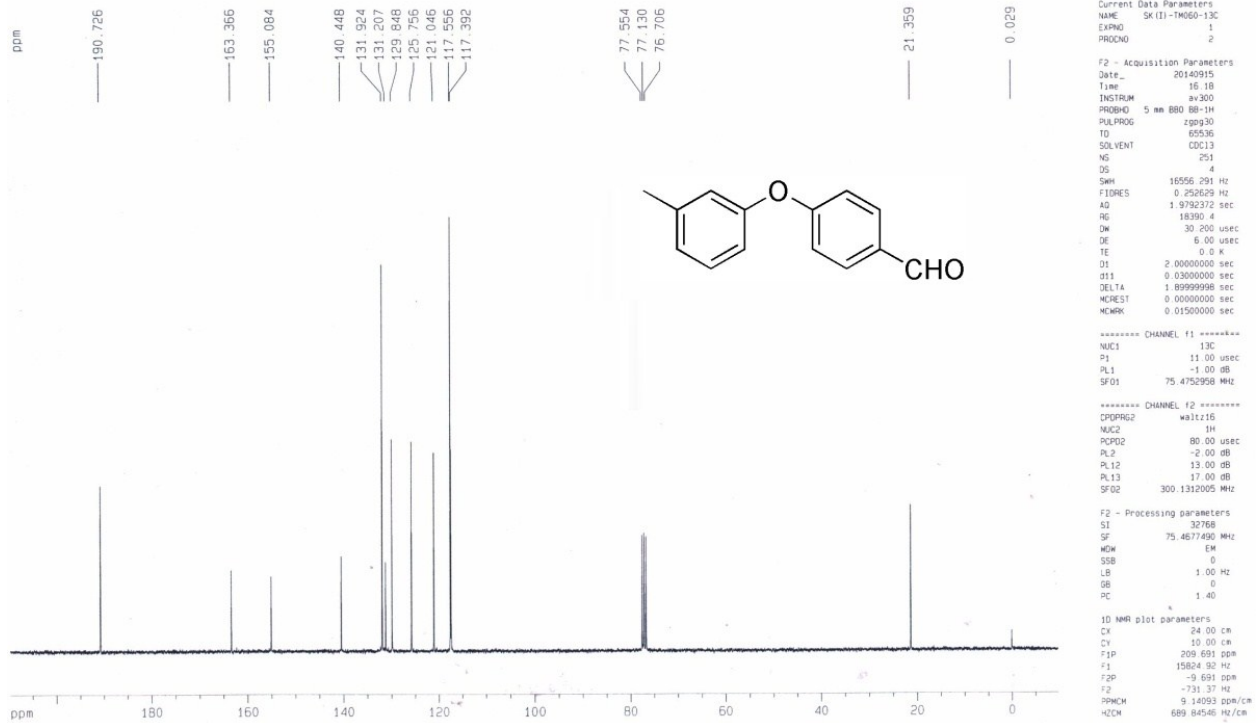

Current Data Parameters  
 NAME Sk(1)-17060-13C  
 EXPNO 1  
 PROCNO 2

F2 - Acquisition Parameters  
 Date\_ 20140915  
 Time 16:18  
 INSTRUM av300  
 PROBHD 5 mm BBO BB-1H  
 PULPROG zgpg30  
 TD 65536  
 SOLVENT CDCl3  
 NS 251  
 DS 4  
 SWH 16556.291 Hz  
 FIDRES 0.252659 Hz  
 AQ 1.9792372 sec  
 RG 18390.4  
 DW 30.200 usec  
 DE 6.00 usec  
 TE 0.0 K  
 D1 2.00000000 sec  
 D11 0.03000000 sec  
 DELT4 1.80999999 sec  
 MCREST 0.00000000 sec  
 MCNMR 0.01500000 sec

\*\*\*\*\* CHANNEL f1 \*\*\*\*\*  
 NUC1 13C  
 P1 11.00 usec  
 PL1 -1.00 dB  
 SF01 75.4752958 MHz

\*\*\*\*\* CHANNEL f2 \*\*\*\*\*  
 CPDPRG2 waltz16  
 MUX2 1H  
 PPO2 80.00 usec  
 PL2 -2.00 dB  
 PL12 13.00 dB  
 PL13 17.00 dB  
 SF02 300.1312005 MHz

F2 - Processing parameters  
 SI 32768  
 SF 75.4677490 MHz  
 MDW EM  
 SSB 0  
 LB 1.00 Hz  
 GB 0  
 PC 1.40

ID NMR plot parameters  
 CX 24.00 cm  
 CY 10.00 cm  
 F1P 209.691 ppm  
 F1 15824.92 Hz  
 F2P -9.691 ppm  
 F2 -731.37 Hz  
 FPMCH 9.14093 ppm/cm  
 HZCM 689.84546 Hz/cm

**1n**;  $\delta_H$  (300 MHz;  $CDCl_3$ , TMS) 2.19 (3H, s), 6.95-7.02 (3H, m), 7.17-7.31 (3H, m), 7.83 (2H, d,  $J = 8.7$  Hz), 9.91 (1H, s);  $\delta_C$  (75 MHz;  $CDCl_3$ , TMS) 16.04, 116.42, 121.15, 125.53, 127.57, 130.59, 130.92, 131.85, 132.04, 152.73, 163.41, 190.72;  $m/z$  213.1019 [(M+H)<sup>+</sup>, 30%]; Elemental analysis (found: C 79.23, H 5.69; for  $C_{14}H_{12}O_2$  requires: C 79.22, H 5.70%).

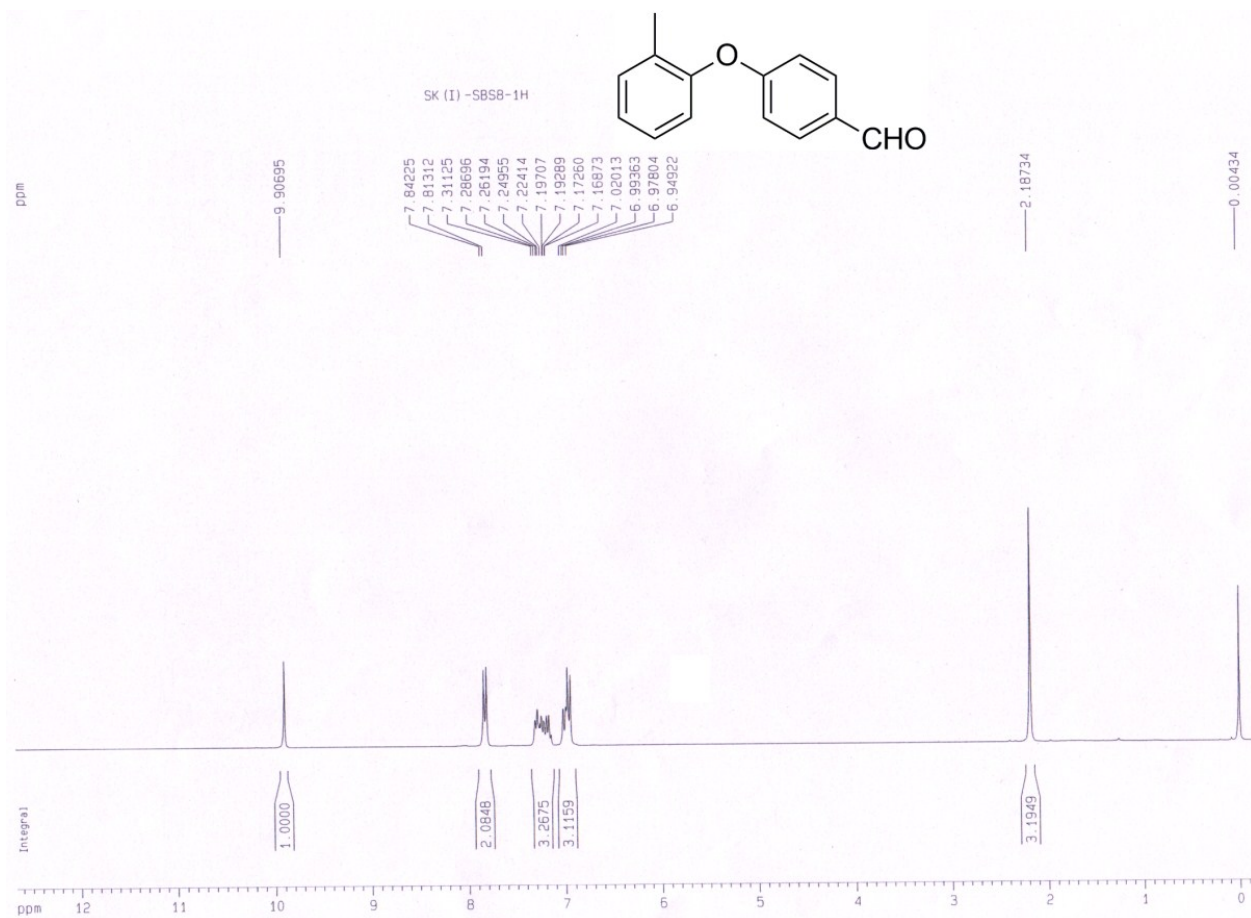

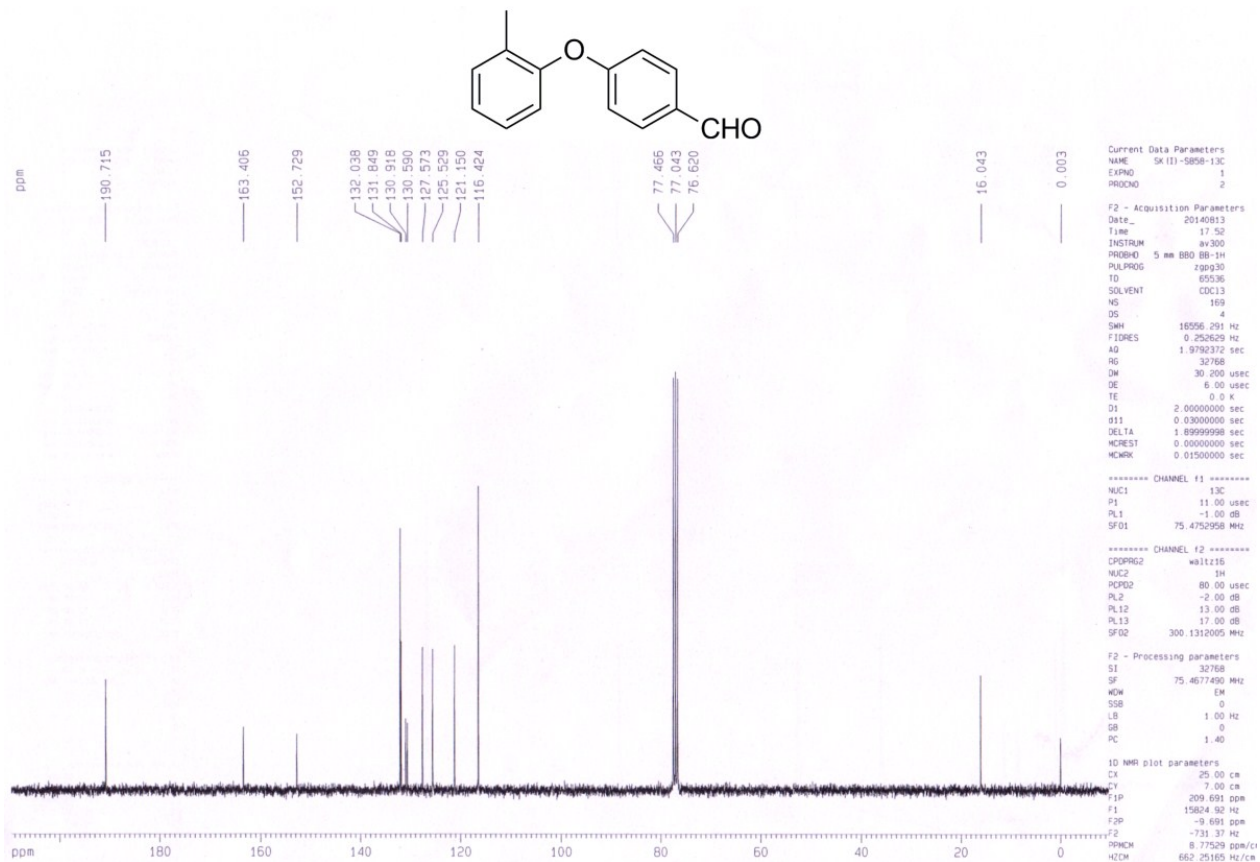

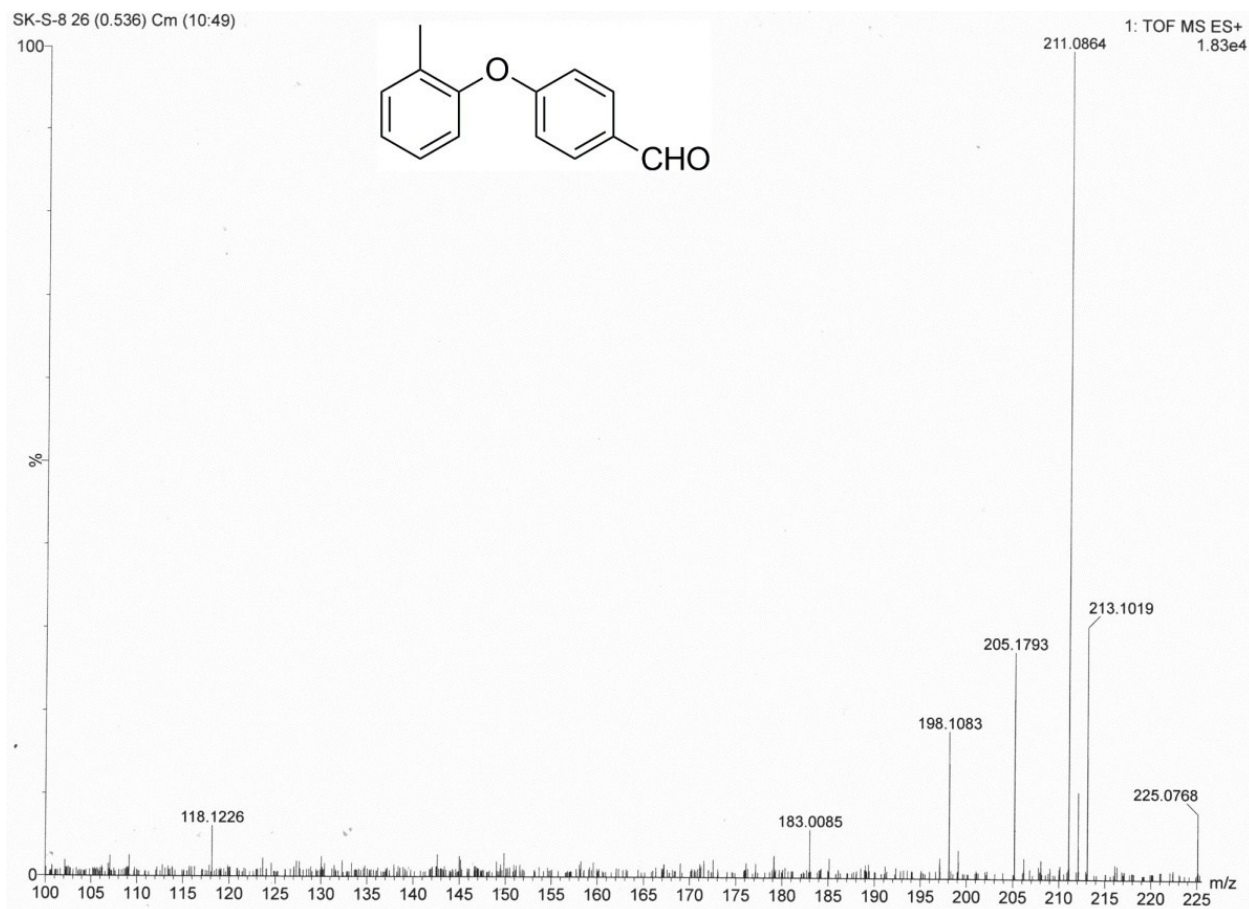

**10**;  $\delta_H$  (600 MHz;  $CDCl_3$ , TMS) 1.15-1.27 (3H, m), 2.59-2.68 (2H, m), 6.93-7.10 (4H, m), 7.22-7.23 (2H, m), 7.82 (2H, d,  $J = 8.4$  Hz), 9.89 (1H, s);  $\delta_C$  (150 MHz;  $CDCl_3$ , TMS) 15.75, 28.36, 117.39, 120.53, 129.56, 132.05, 141.28, 152.96, 163.80, 190.91;  $m/z$  227.0817 [(M+H)<sup>+</sup>, 100%]; Elemental analysis (found: C 79.60, H 6.22; for  $C_{15}H_{14}O_2$  requires: C 79.62, H 6.24%).

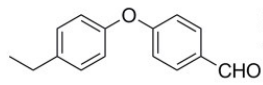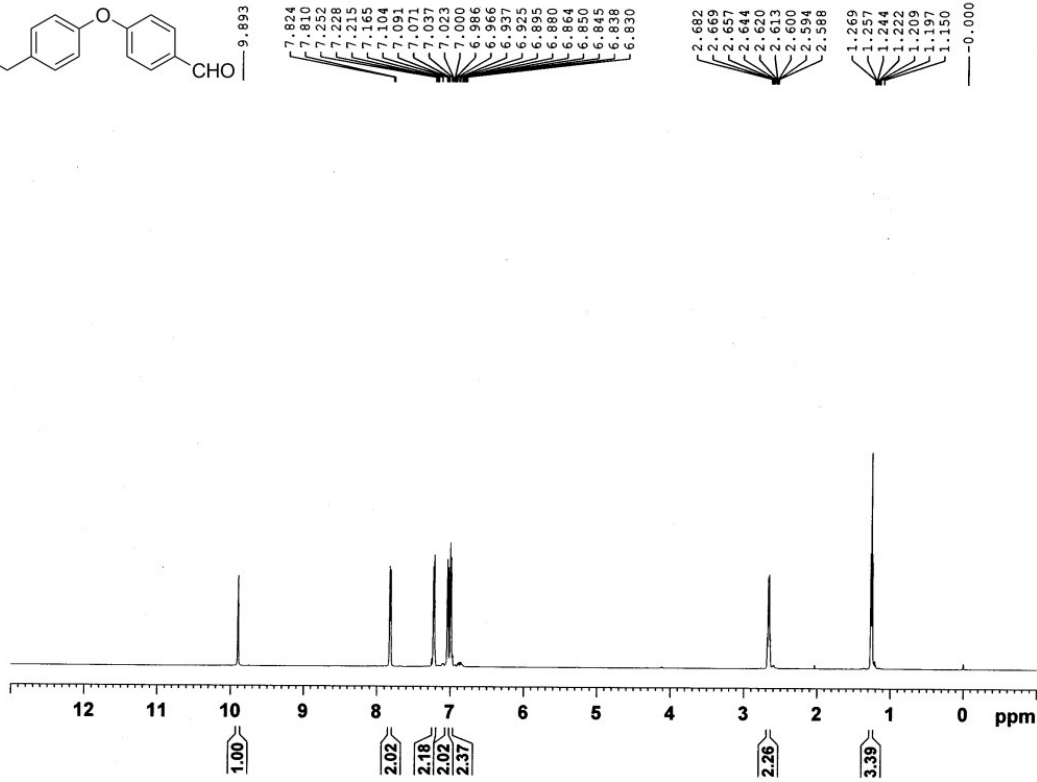

```

Current Data Parameters
NAME: MK171-TR-033-1H
EXPNO: 1
PROCNO: 1

F2 - Acquisition Parameters
Date_: 20140618
Time: 14.24
INSTRUM: spect
PROBHD: 5 mm PABBO BB/
PULPROG: zg30
TD: 32768
SOLVENT: CDCl3
NS: 15
DS: 4
SWH: 12019.270 Hz
FIDRES: 0.366798 Hz
AQ: 1.3631488 sec
RG: 27.82
DM: 41.600 usec
DE: 6.50 usec
TE: 300.2 K
D1: 1.00000000 sec
TDO:

----- CHANNEL f1 -----
SFO1: 600.1737063 MHz
NUC1: 13
P1: 12.00 usec
PLW1: 21.00000000 W

F2 - Processing parameters
SI: 16384
SF: 600.1700193 MHz
WDW: EM
SSB: 0
LB: 0.30 Hz
GB: 0
PC: 1.00

```



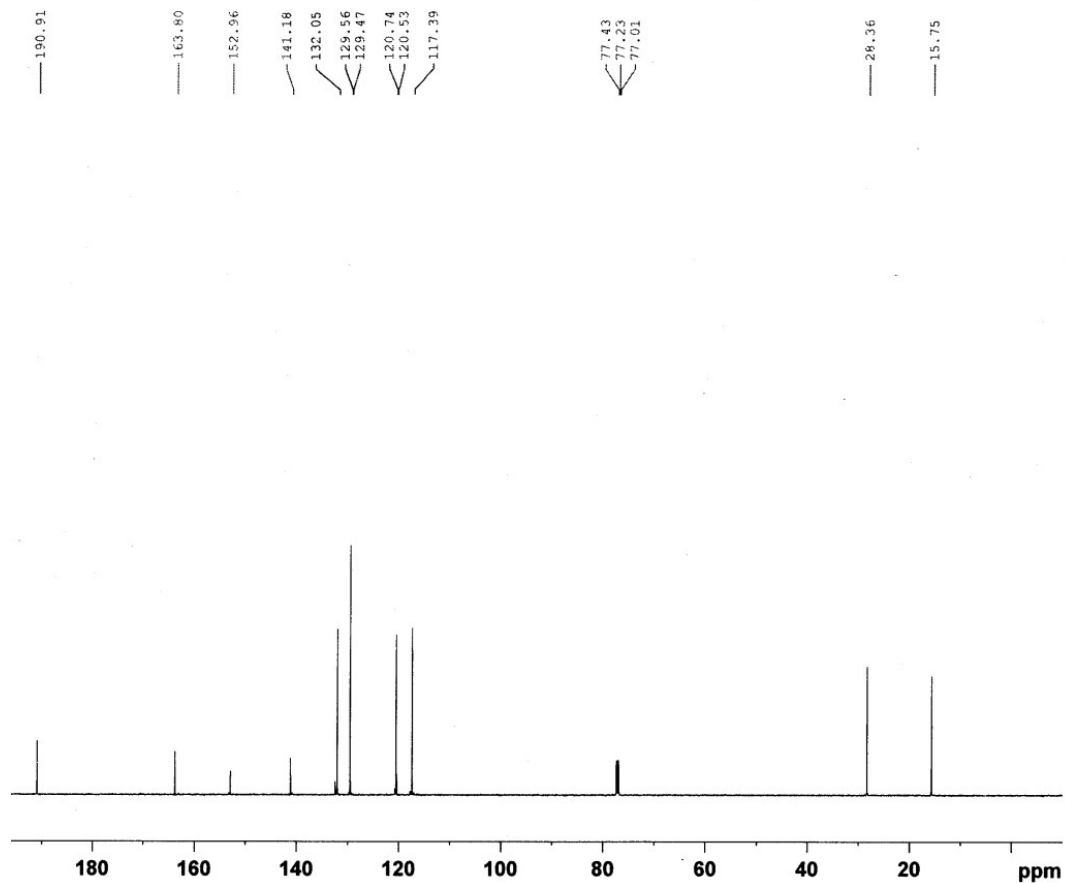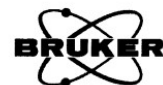

```

Current Data Parameters
NAME      NK(T)-TM-053-13C
EXNO     1
PROCNO   1

F2 - Acquisition Parameters
Date_    20140618
Time     14.15
INSTRUM spect
PROBHD   5 mm F4BBO BB/
PULPROG zgpg30
TD       32768
SOLVENT  CDCl3
NS       133
DS       2
SWH      36057.691 Hz
FIDRES   1.100393 Hz
AQ       0.4543829 sec
RG       65.24
RW       13.867 usec
DE       6.50 usec
TE       301.0 K
D1       2.0000000 sec
D11      0.0300000 sec
TDO      1

----- CHANNEL f1 -----
SF01    150.9279571 MHz
NUC1    13C
P1      10.50 usec
PLW1    95.0000000 W

----- CHANNEL f2 -----
SF02    600.1724007 MHz
NUC2    1H
CPDPRG2 waltz16
PCPD2   70.00 usec
PLW2    21.0000000 W
PLW12   0.61714000 W
PLW13   0.30239999 W

F2 - Processing parameters
SI      16384
SF      150.912501 MHz
WMW     EM
SSB     0
LB      1.00 Hz
GB      0
PC      1.40

```

SK(l)-TM-O-53 8 (0.172) Cm (2:47)

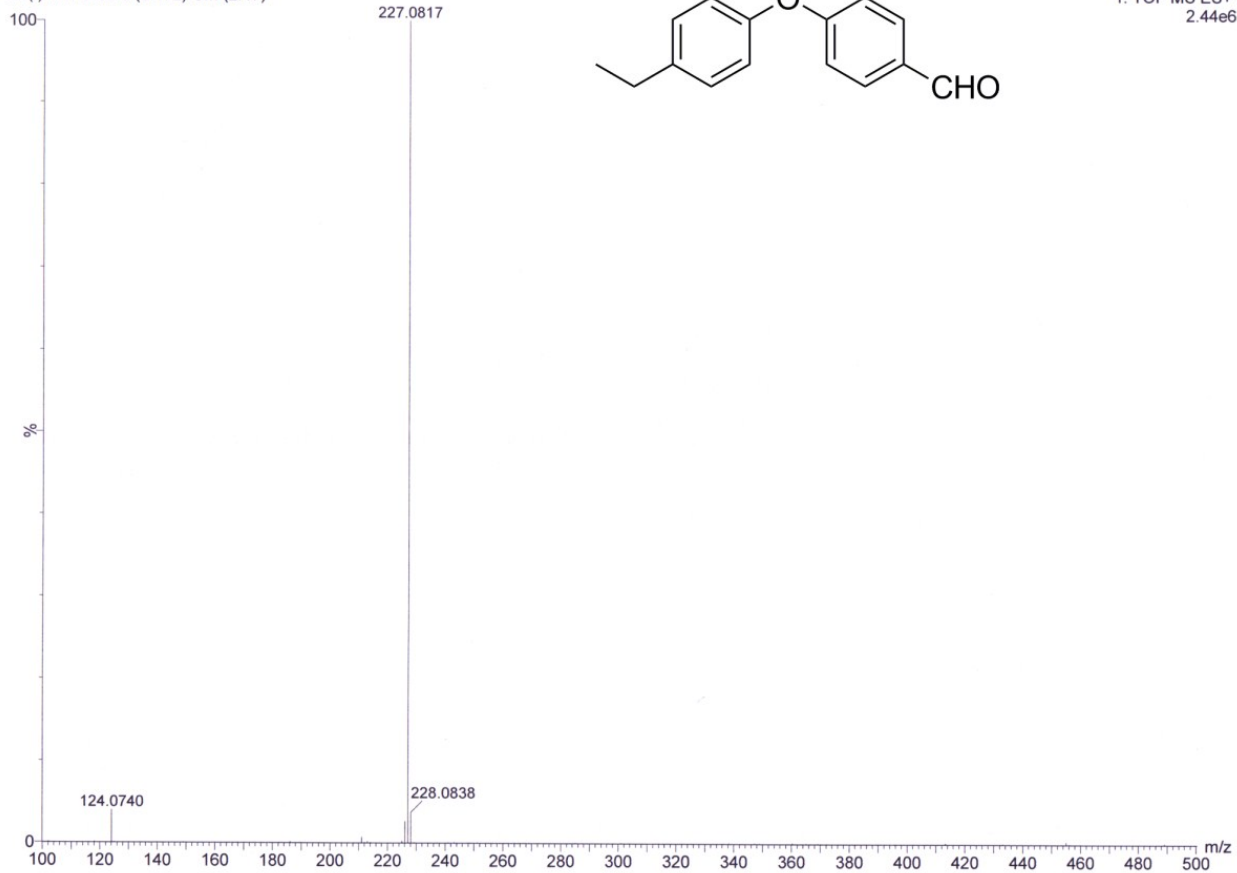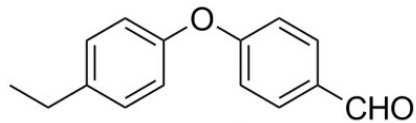

1: TOF MS ES+  
2.44e6
